# Supplementary material for: Vulnerability to snakebite envenoming and access to healthcare in the Terai region of Nepal: a geospatial analysis
Source: PubMed Central journal article supplement (PMC10306013; doi:10.1016/j.lansea.2022.100103), 2022-11-17

# High SB risk Vs FLDH\_rc

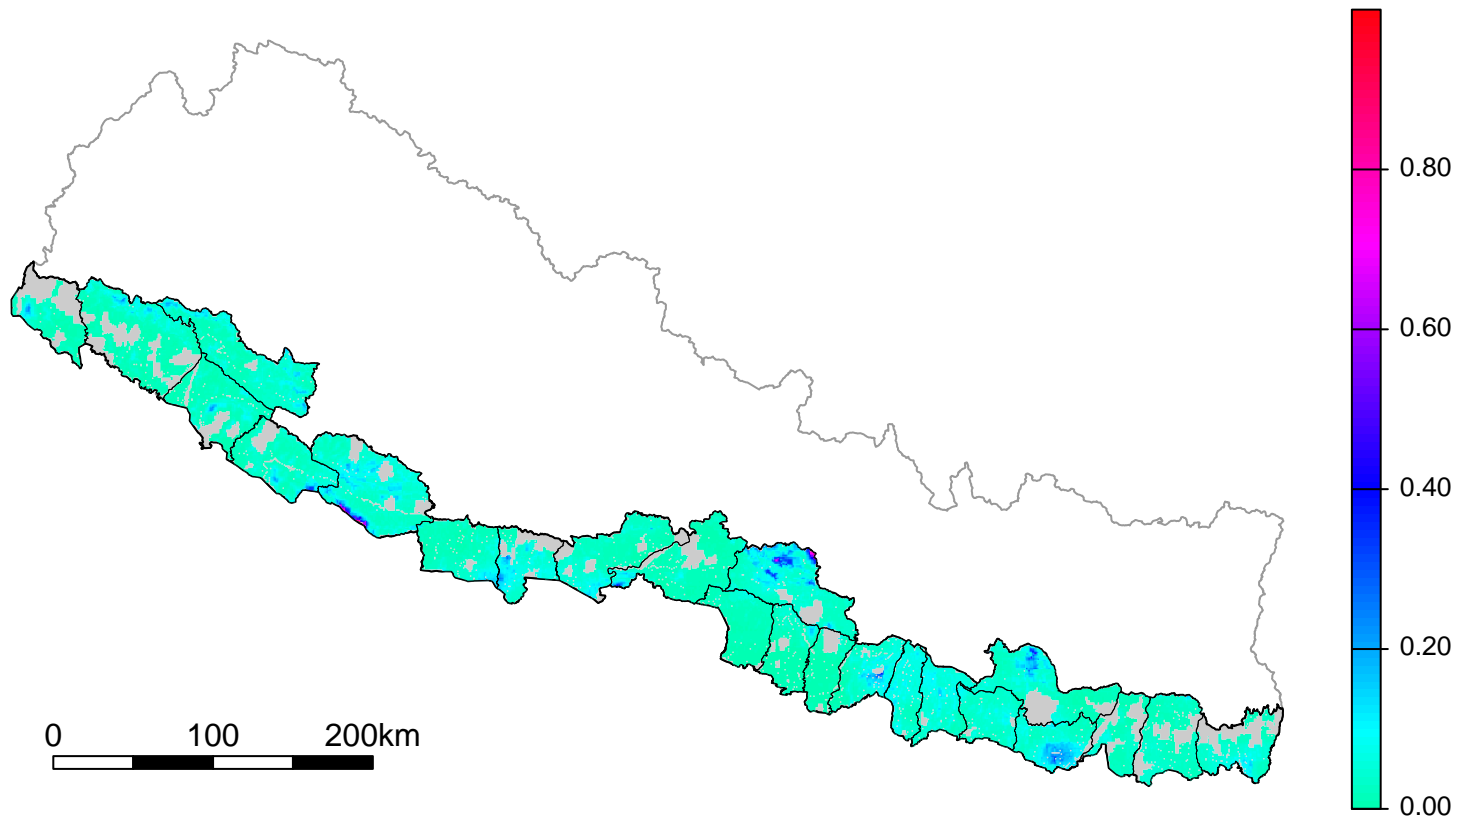

# High SB risk Vs FLDN\_rc

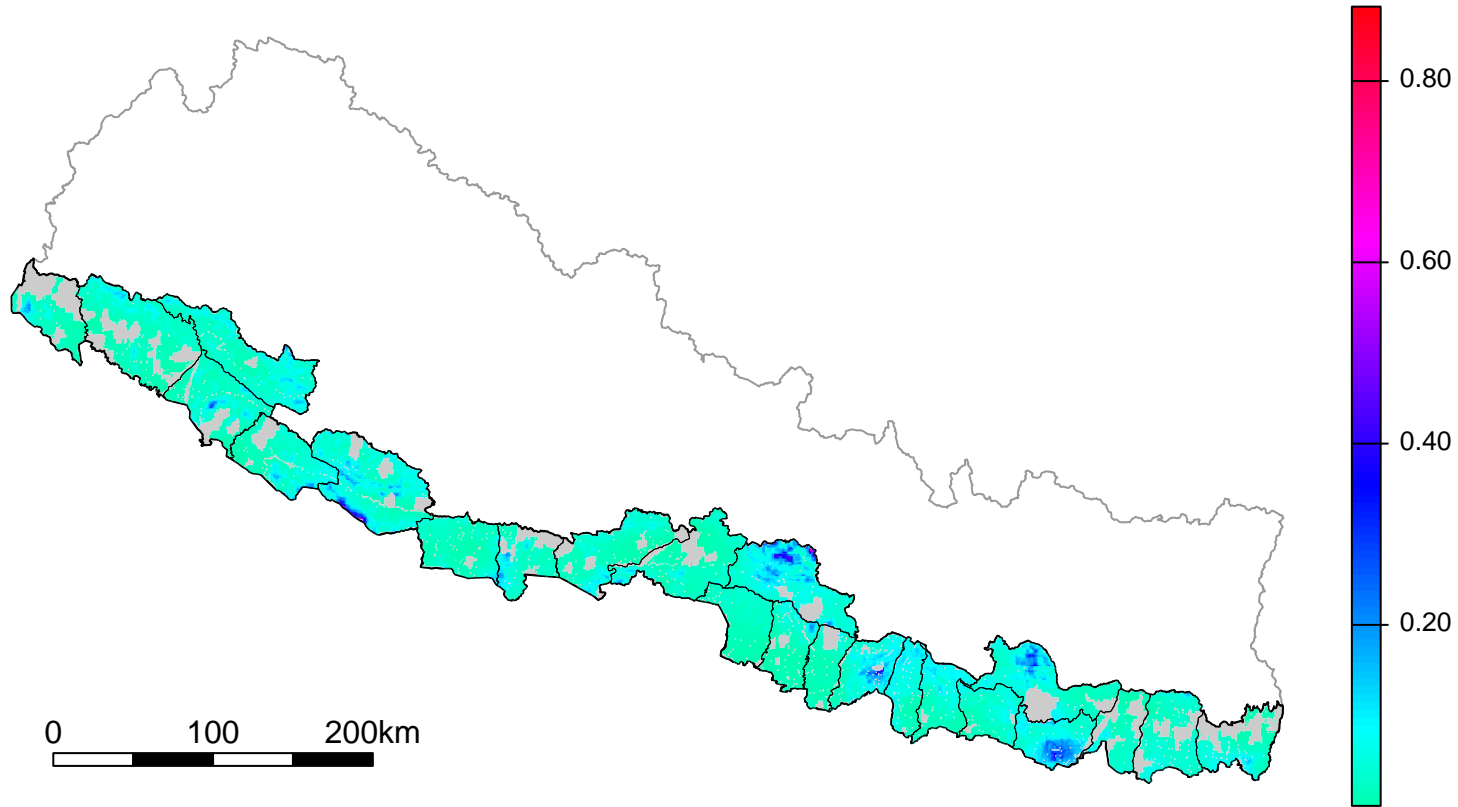

# High SB risk Vs FLWH\_rc

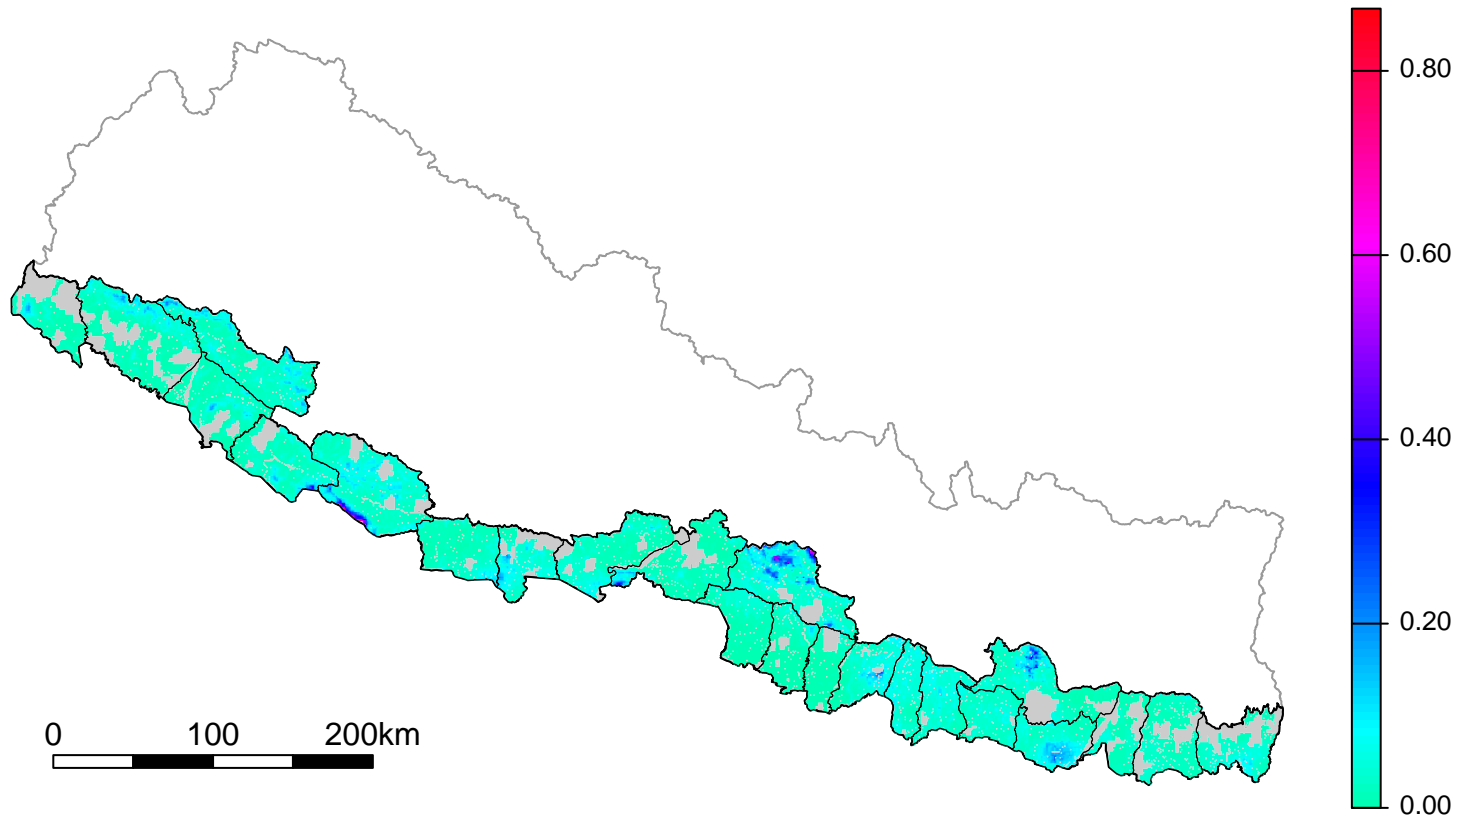

# High SB risk Vs FLWN\_rc

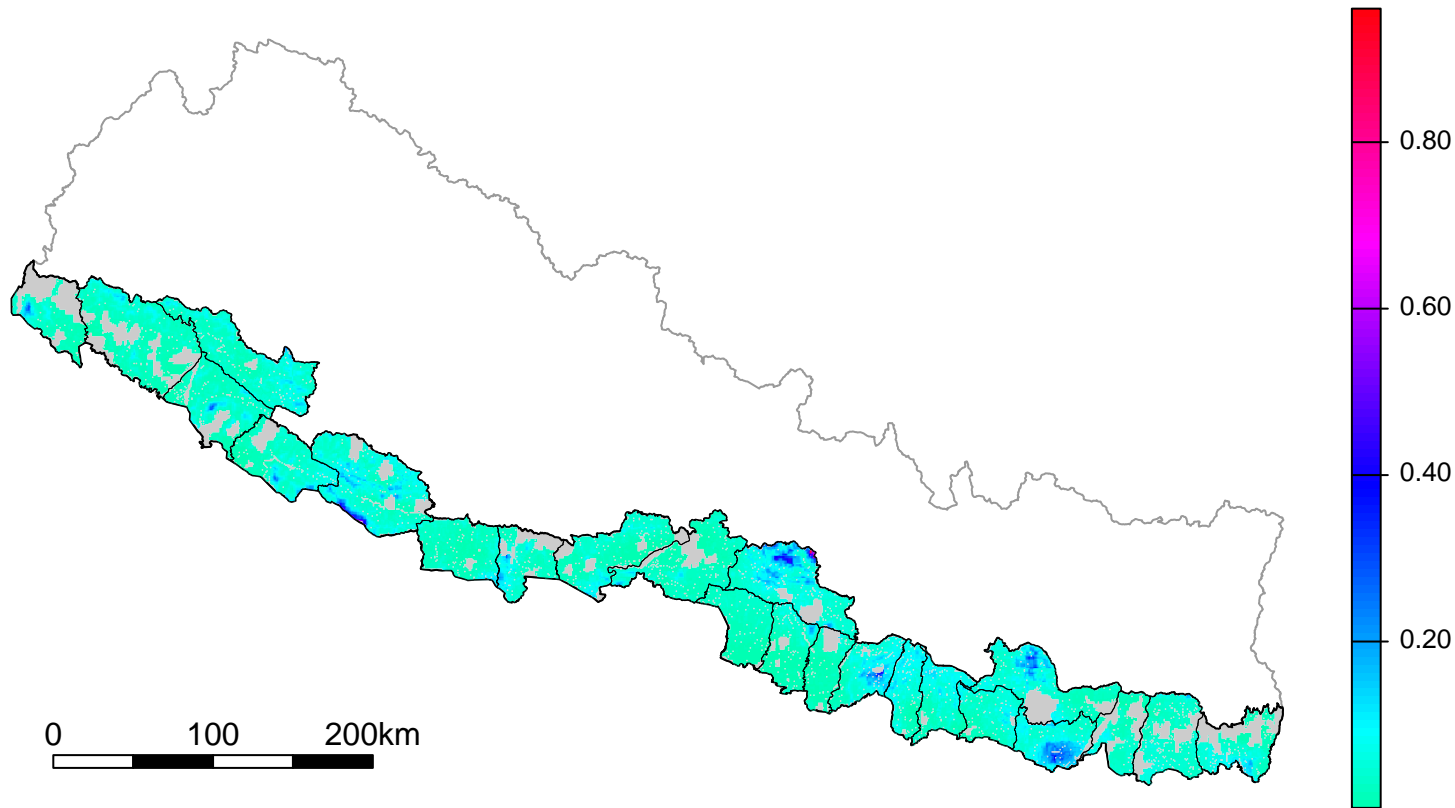

# High SB risk Vs MLDH\_rc

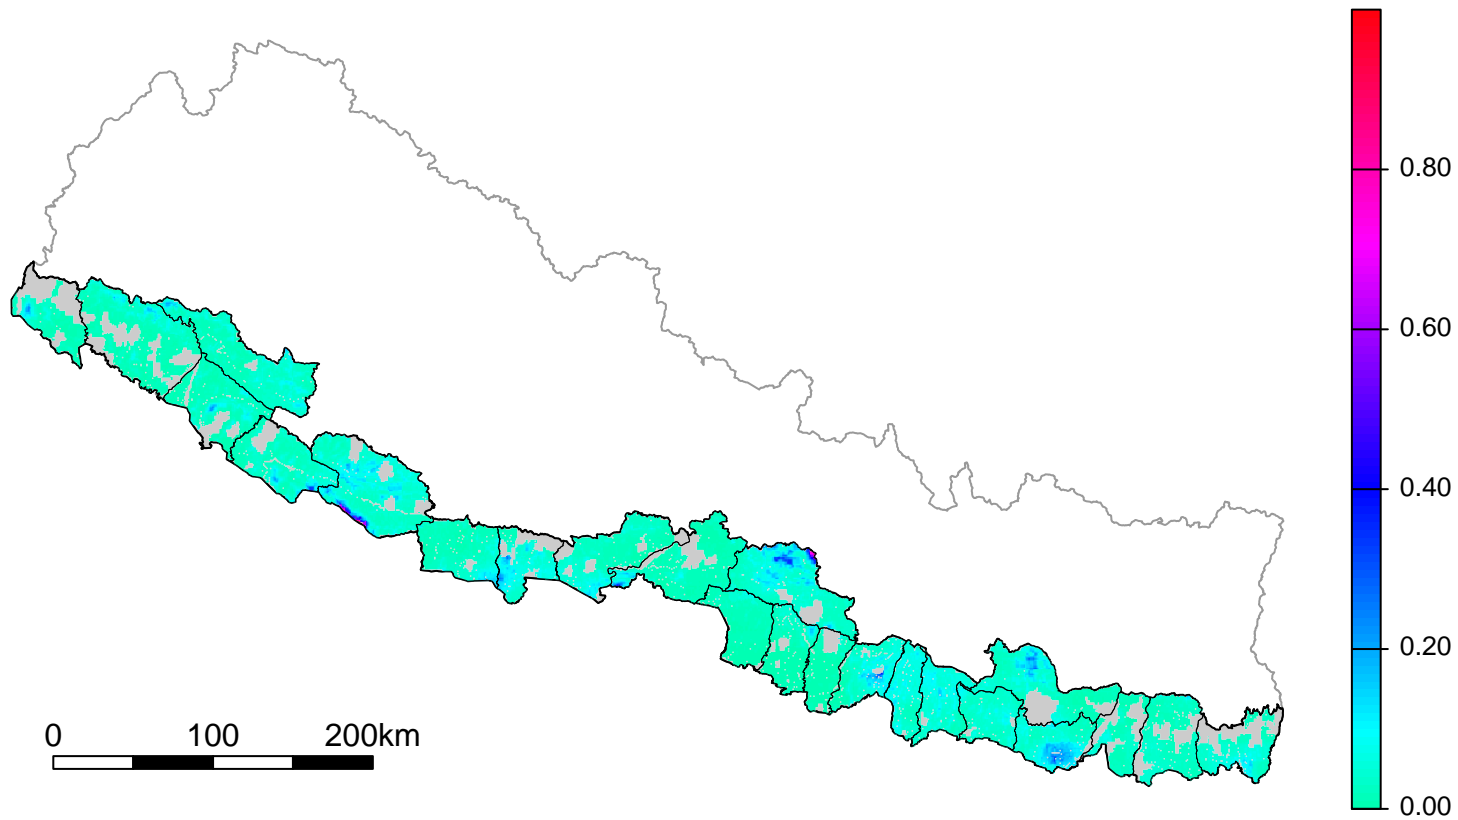

# High SB risk Vs MLDN\_rc

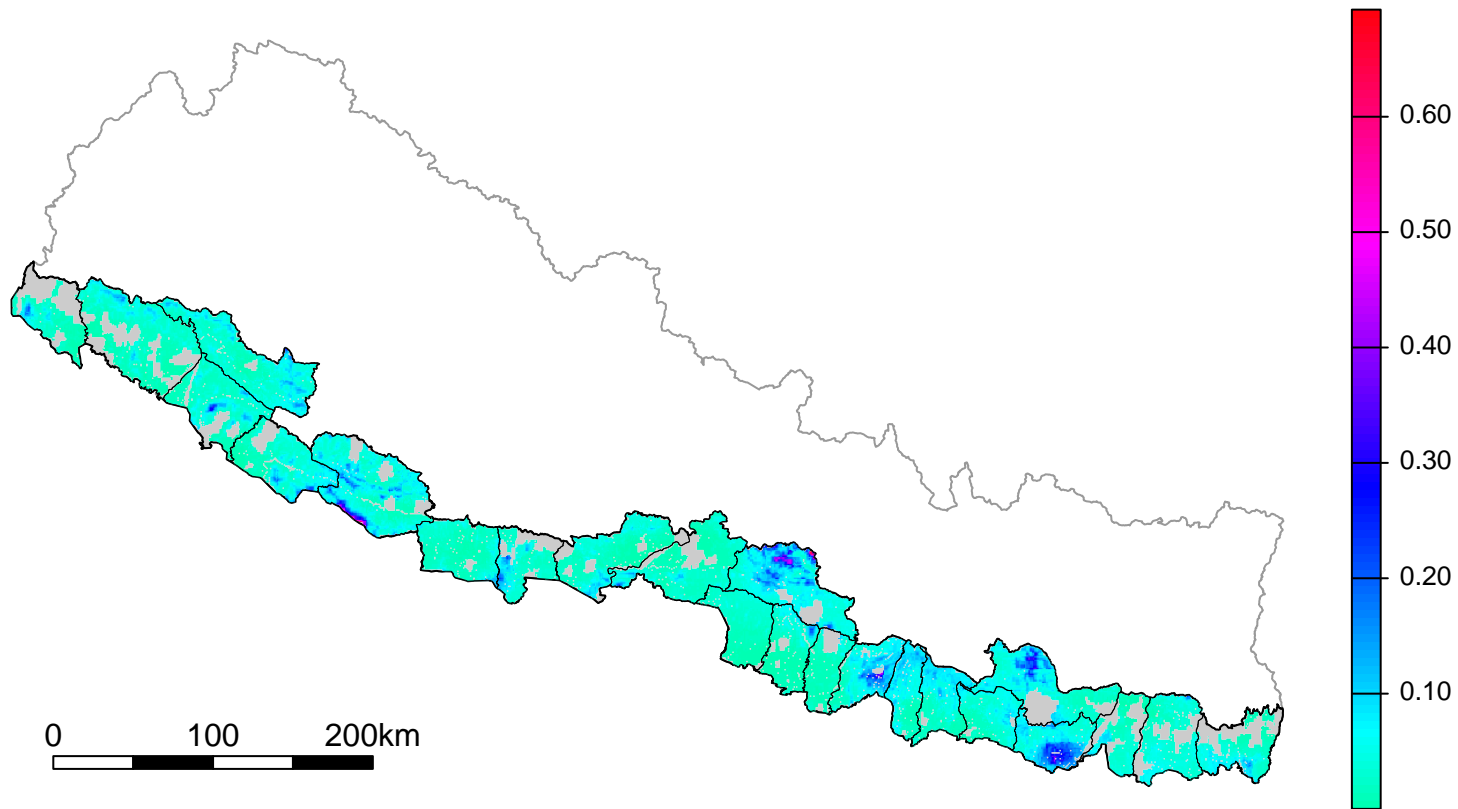

# High SB risk Vs MLWH\_rc

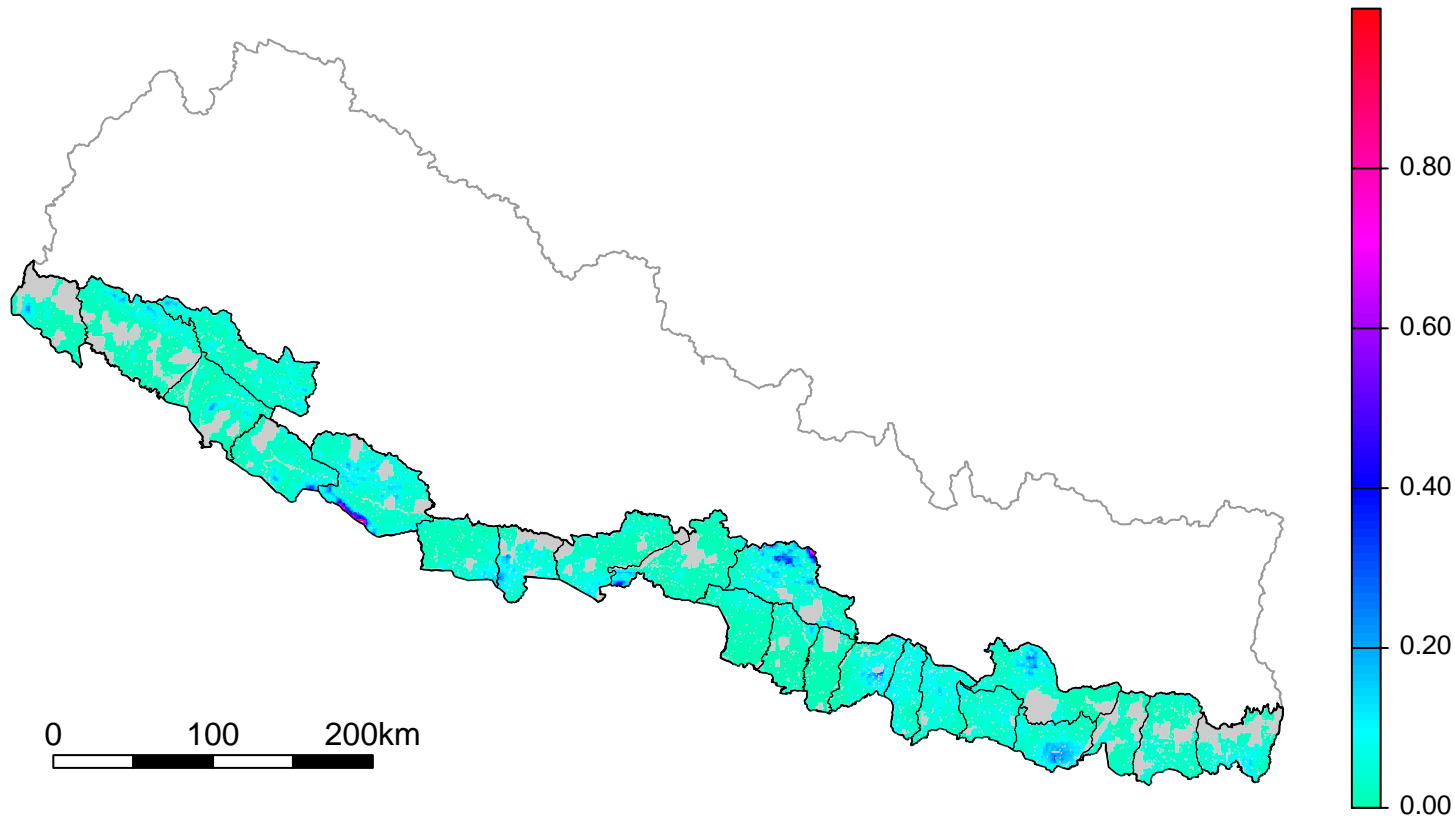

# High SB risk Vs MLWN\_rc

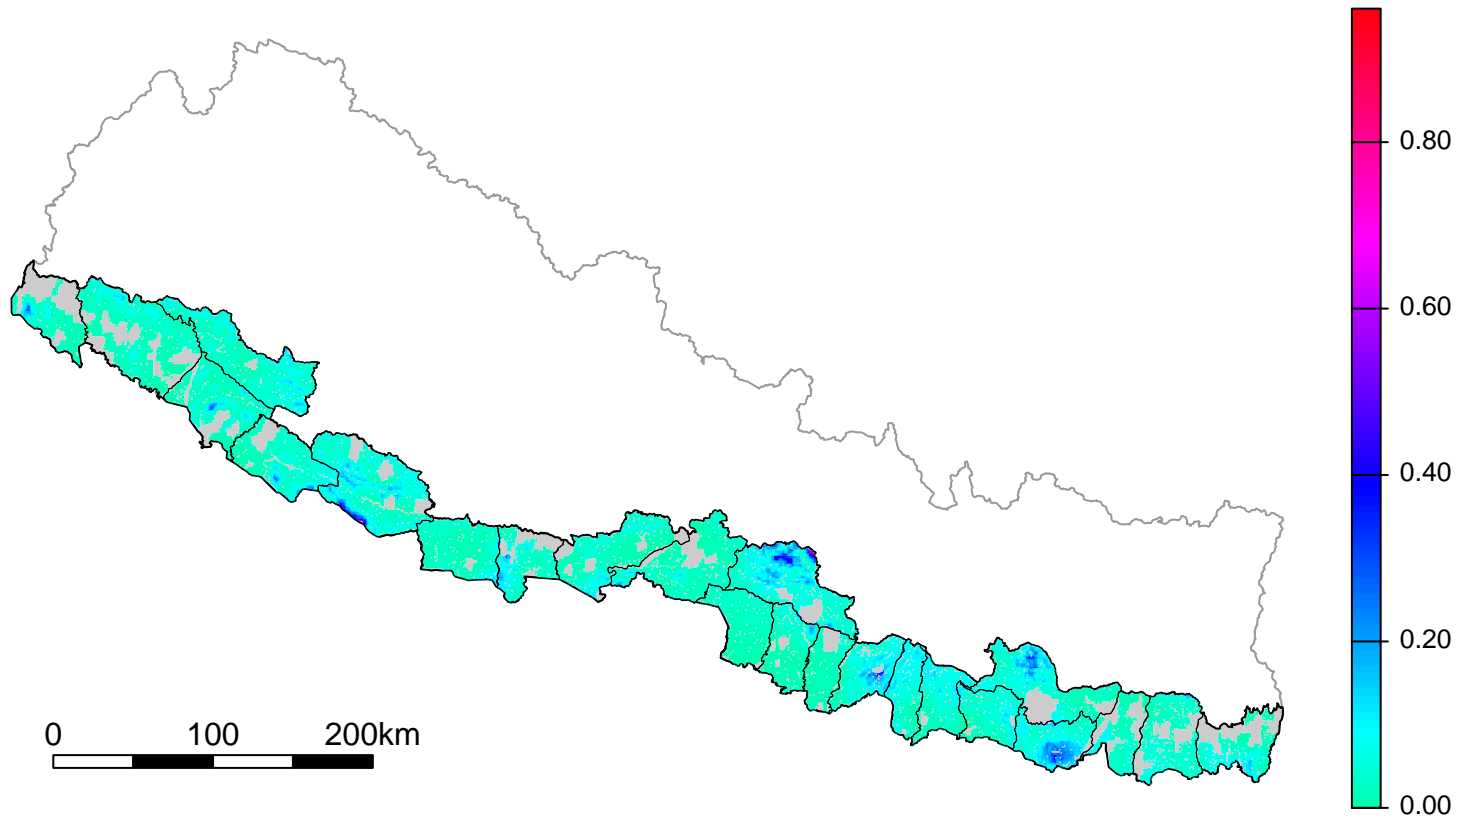



# High SB risk Vs TLDH\_rc

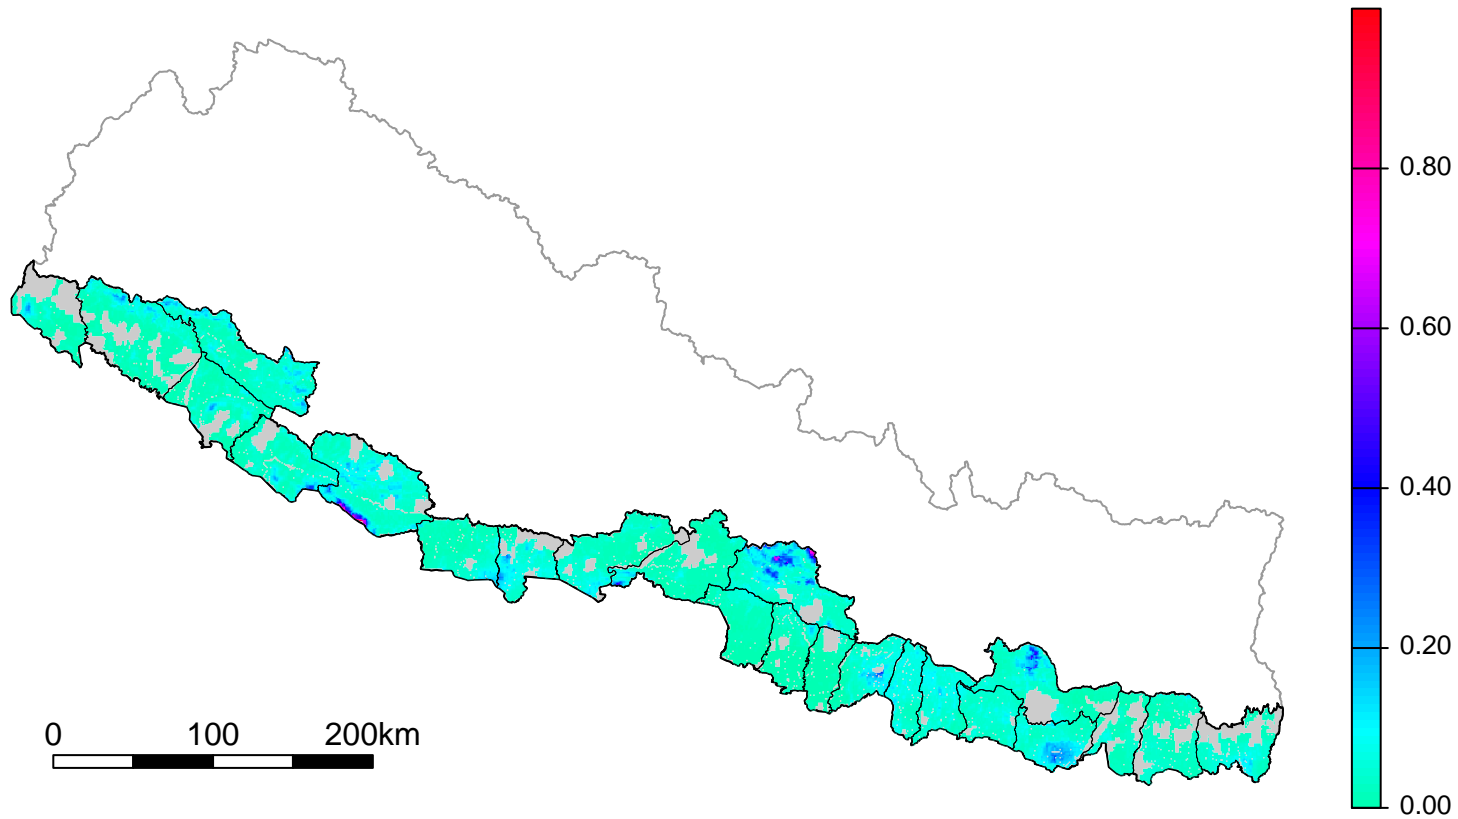

# High SB risk Vs TLDN\_rc

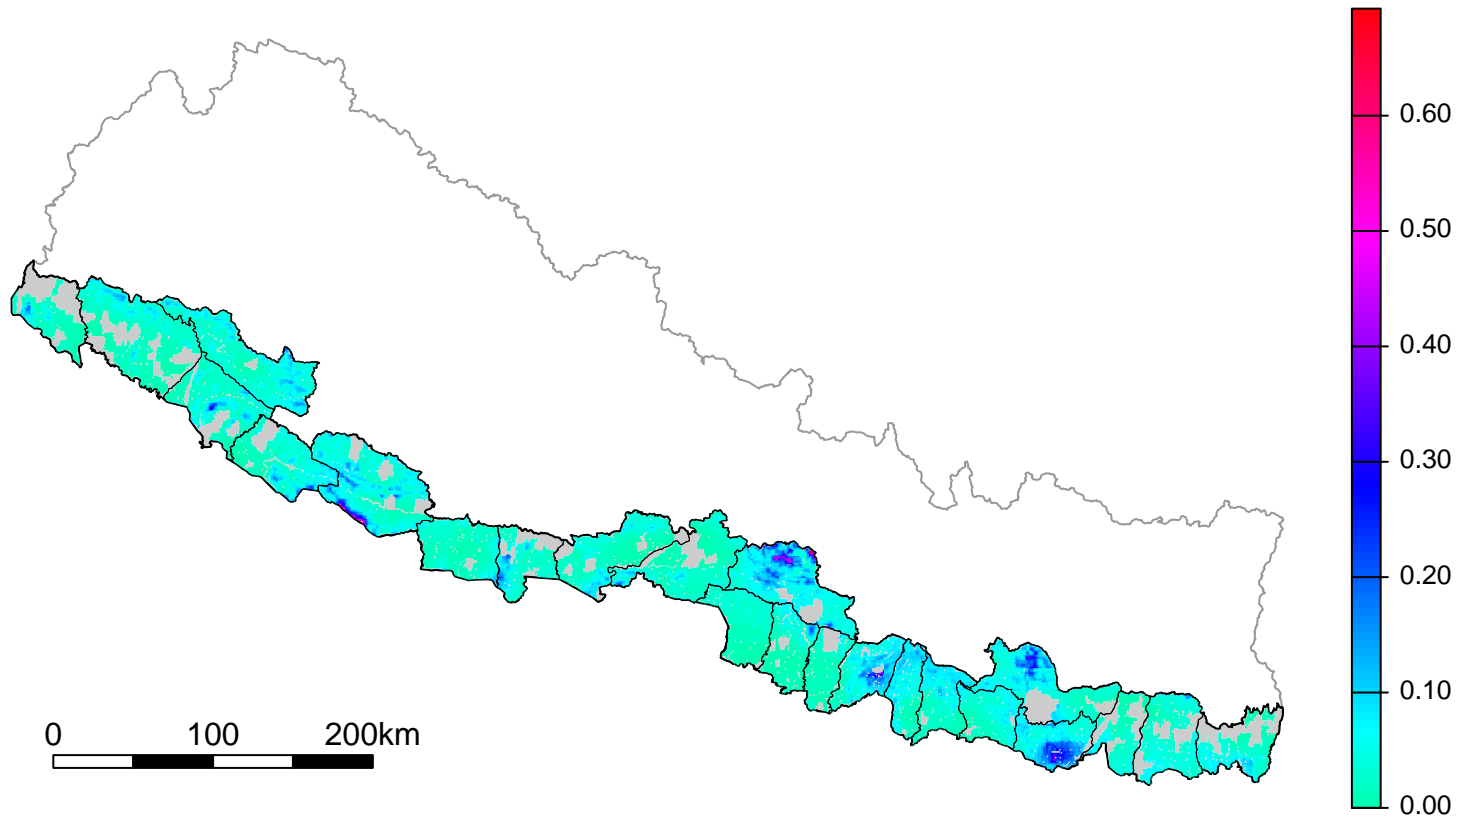

# High SB risk Vs TLWH\_rc

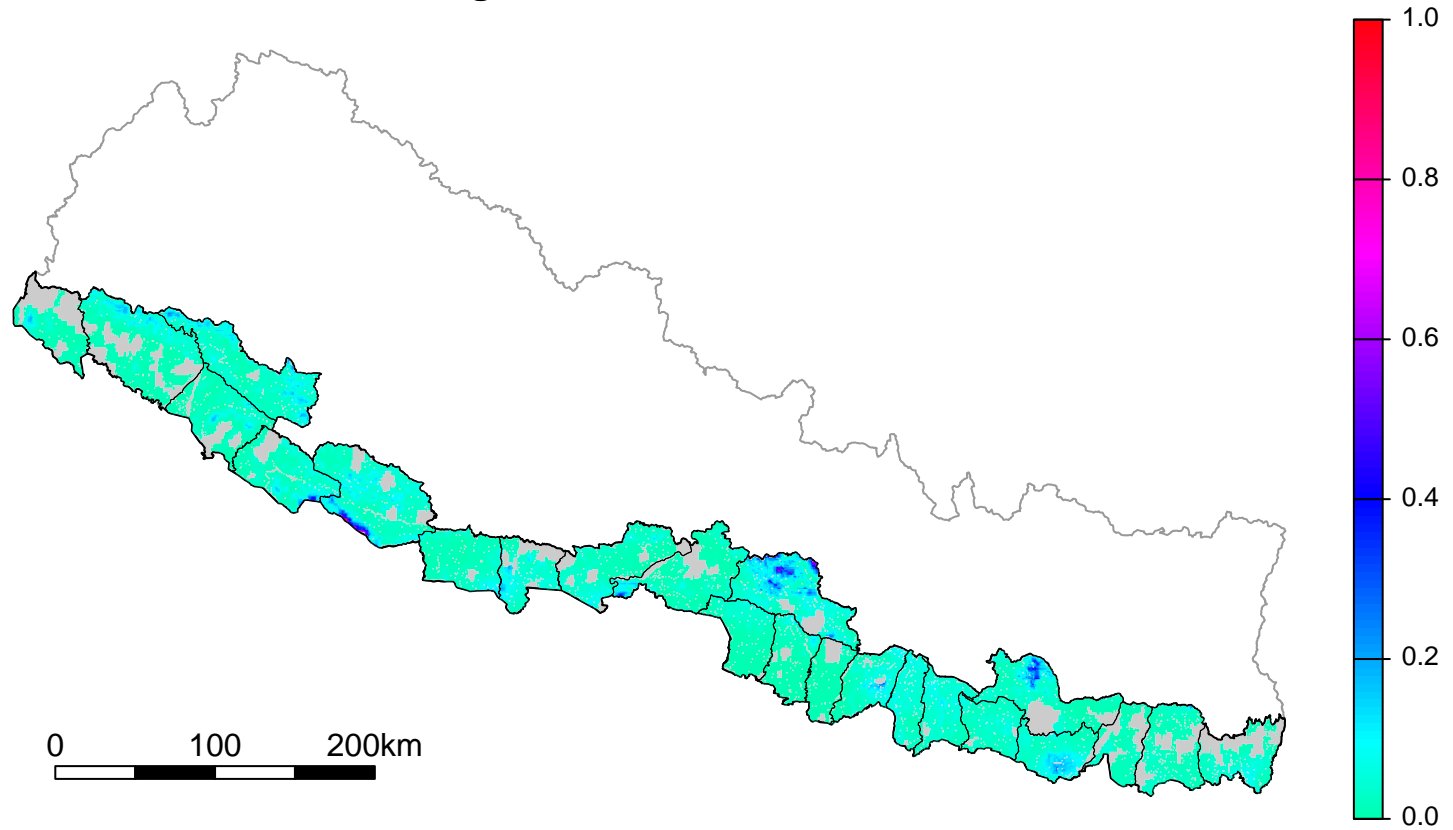

# High SB risk Vs TLWN\_rc

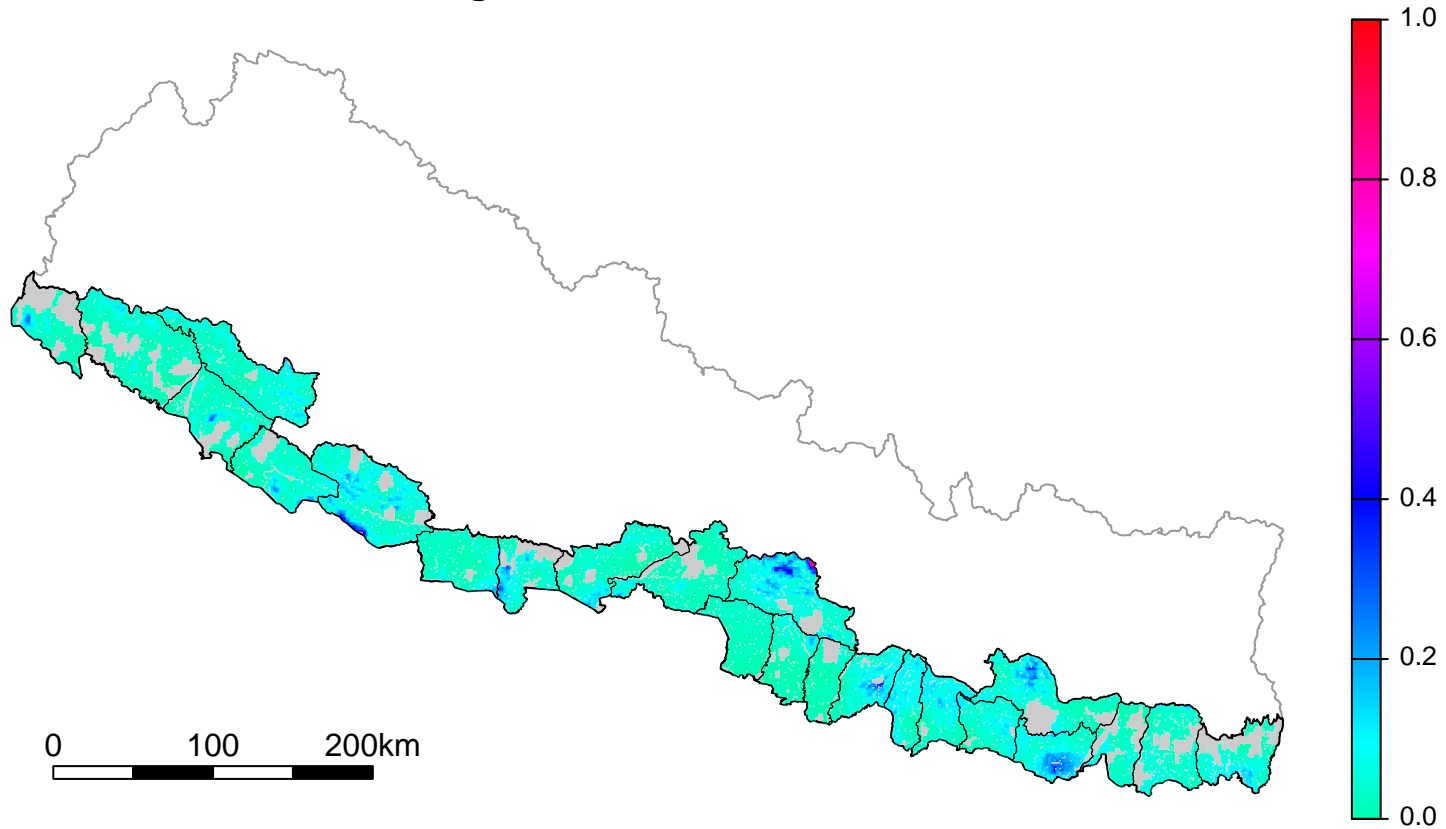

# Average SB risk Vs FADH\_rc

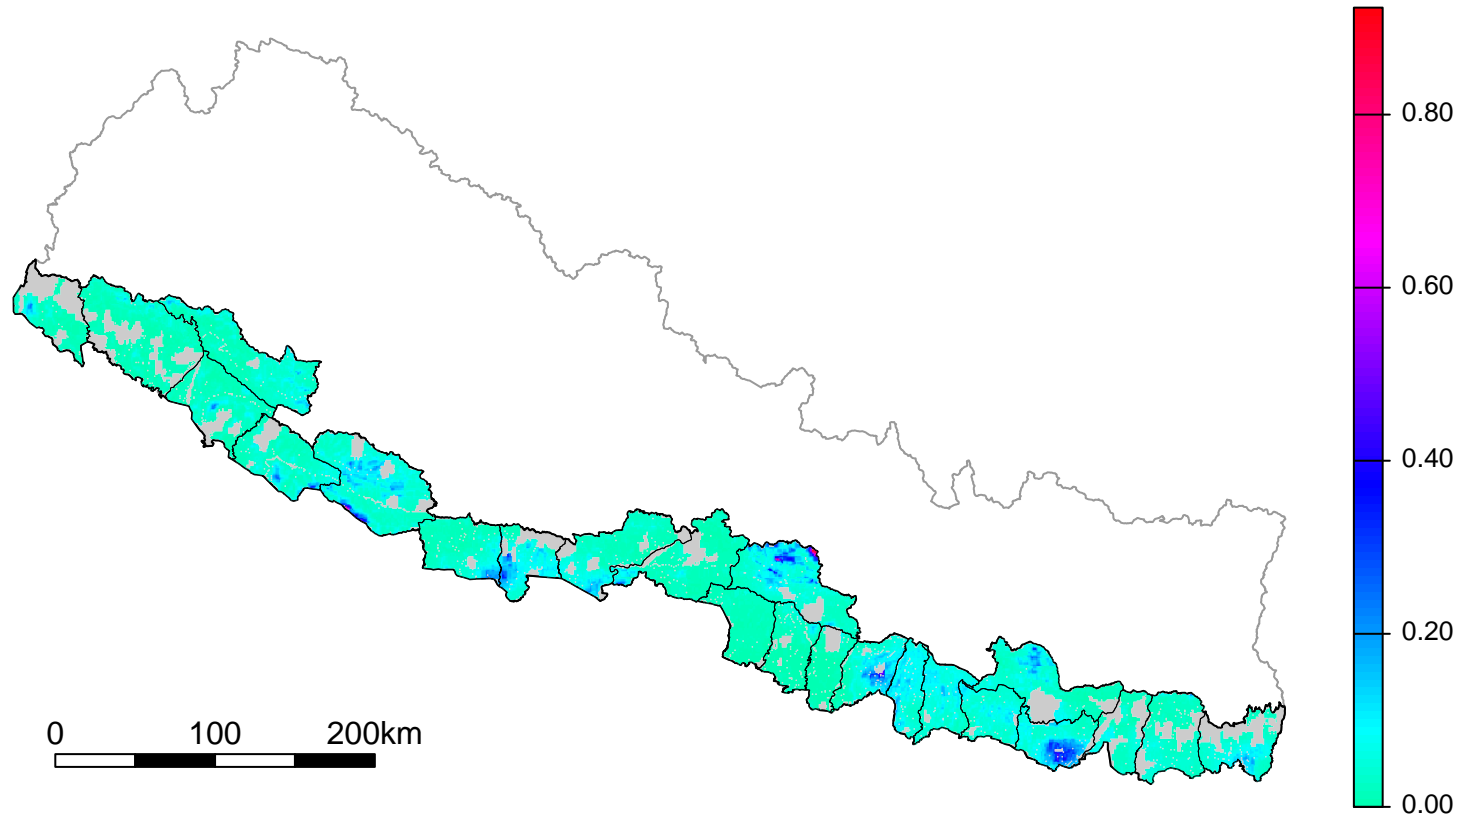

# Average SB risk Vs FADN\_rc

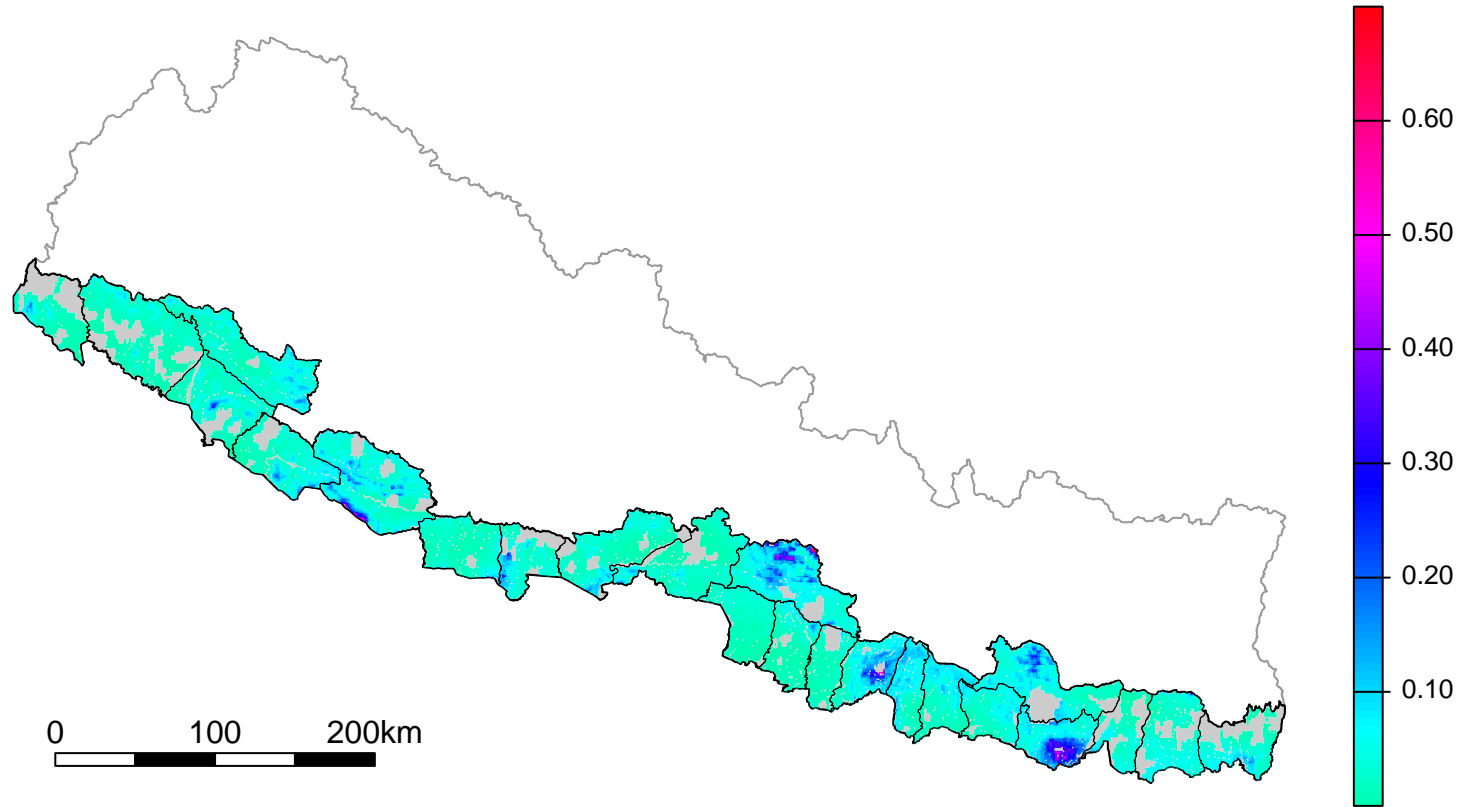

# Average SB risk Vs FAWH\_rc

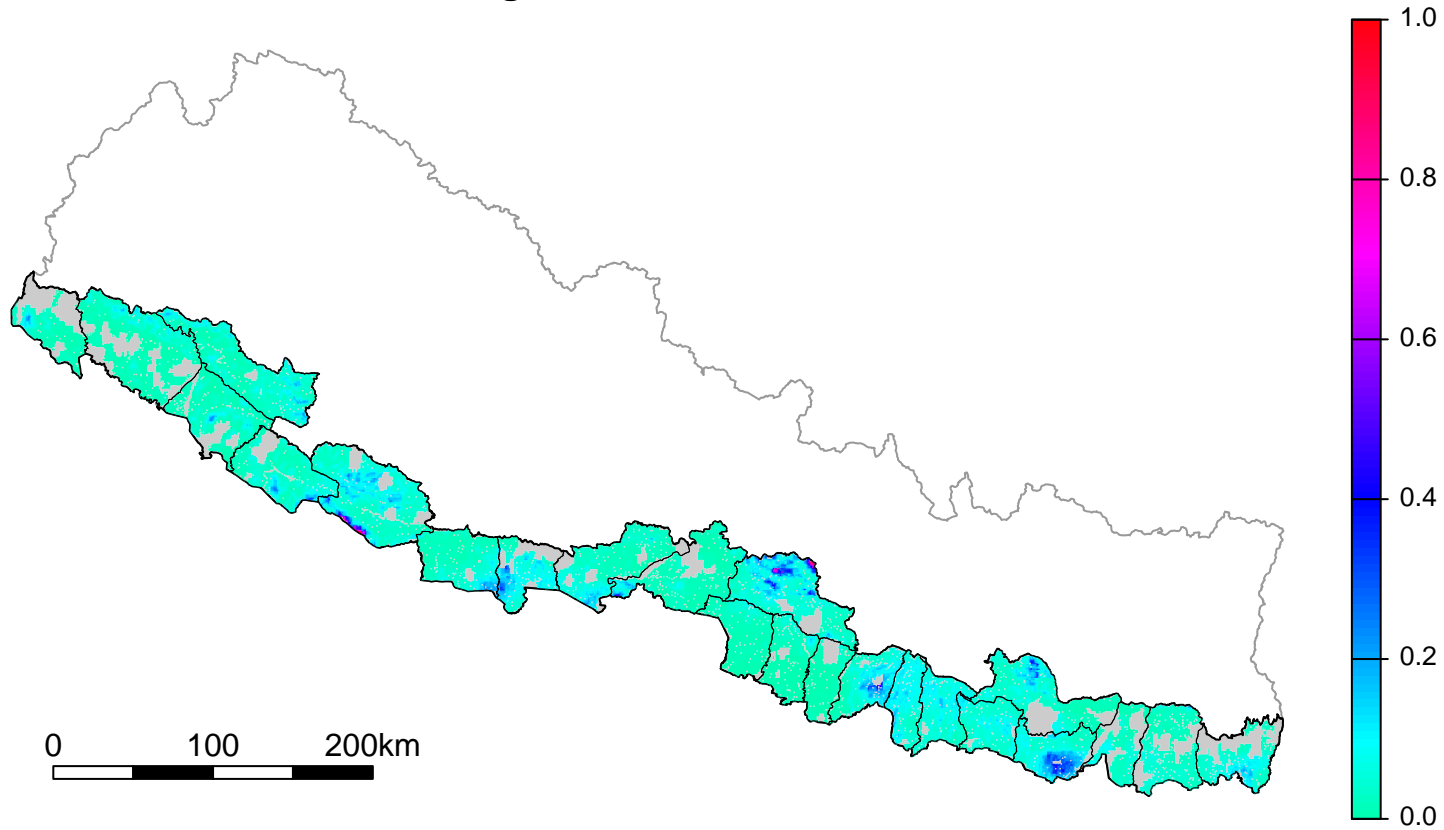

# Average SB risk Vs FAWN\_rc

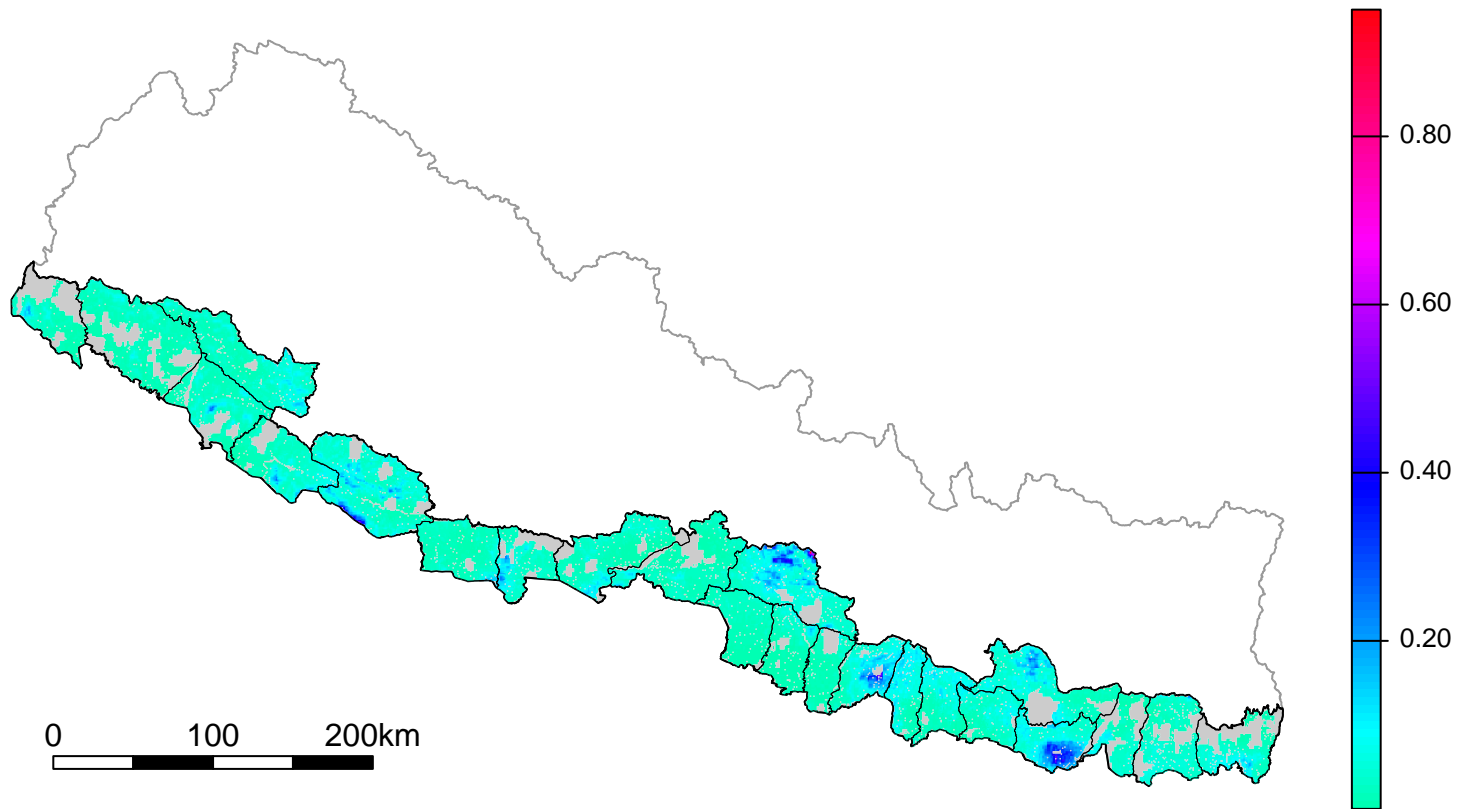



# Average SB risk Vs MADH\_rc

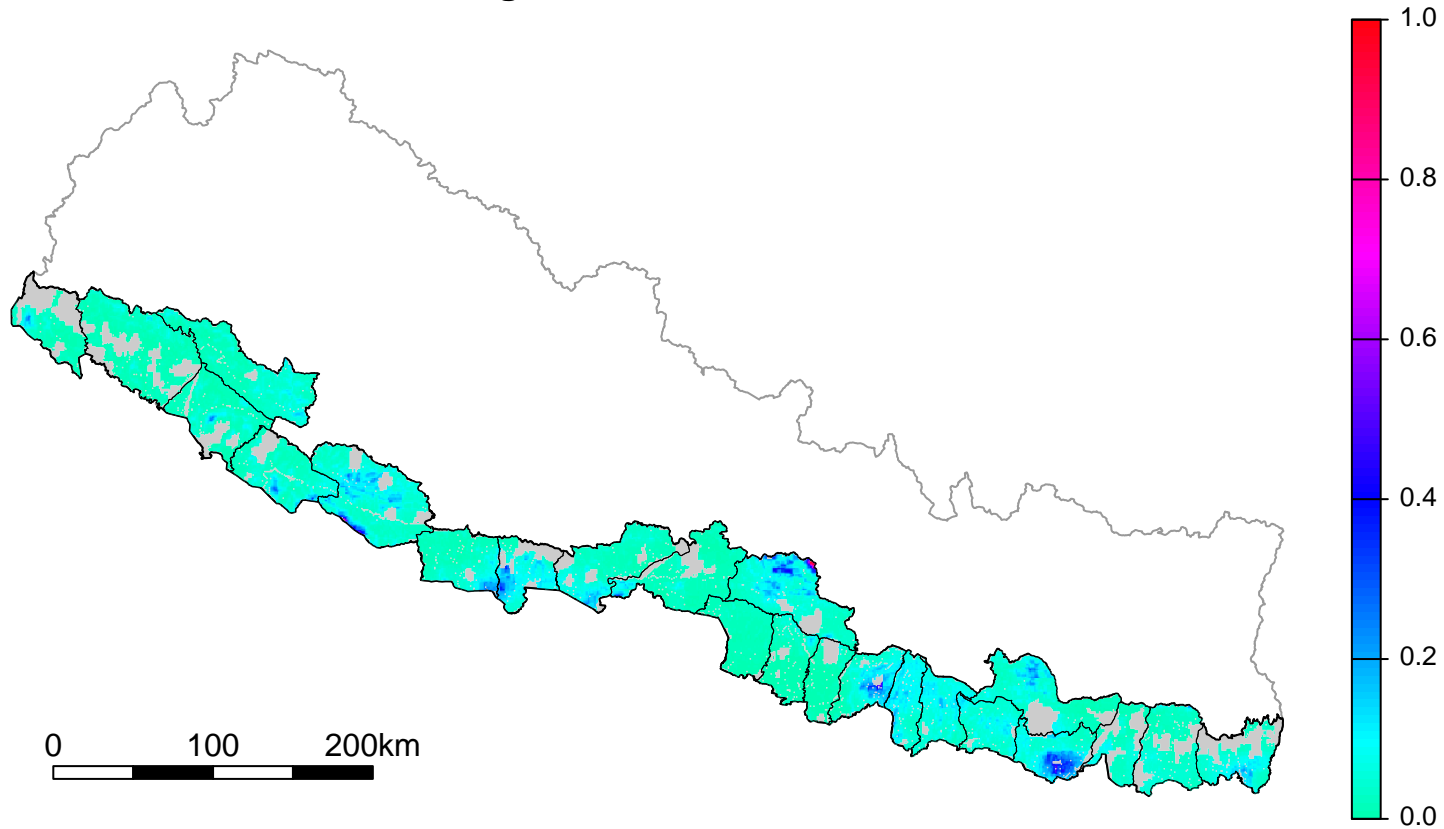

# Average SB risk Vs MADN\_rc

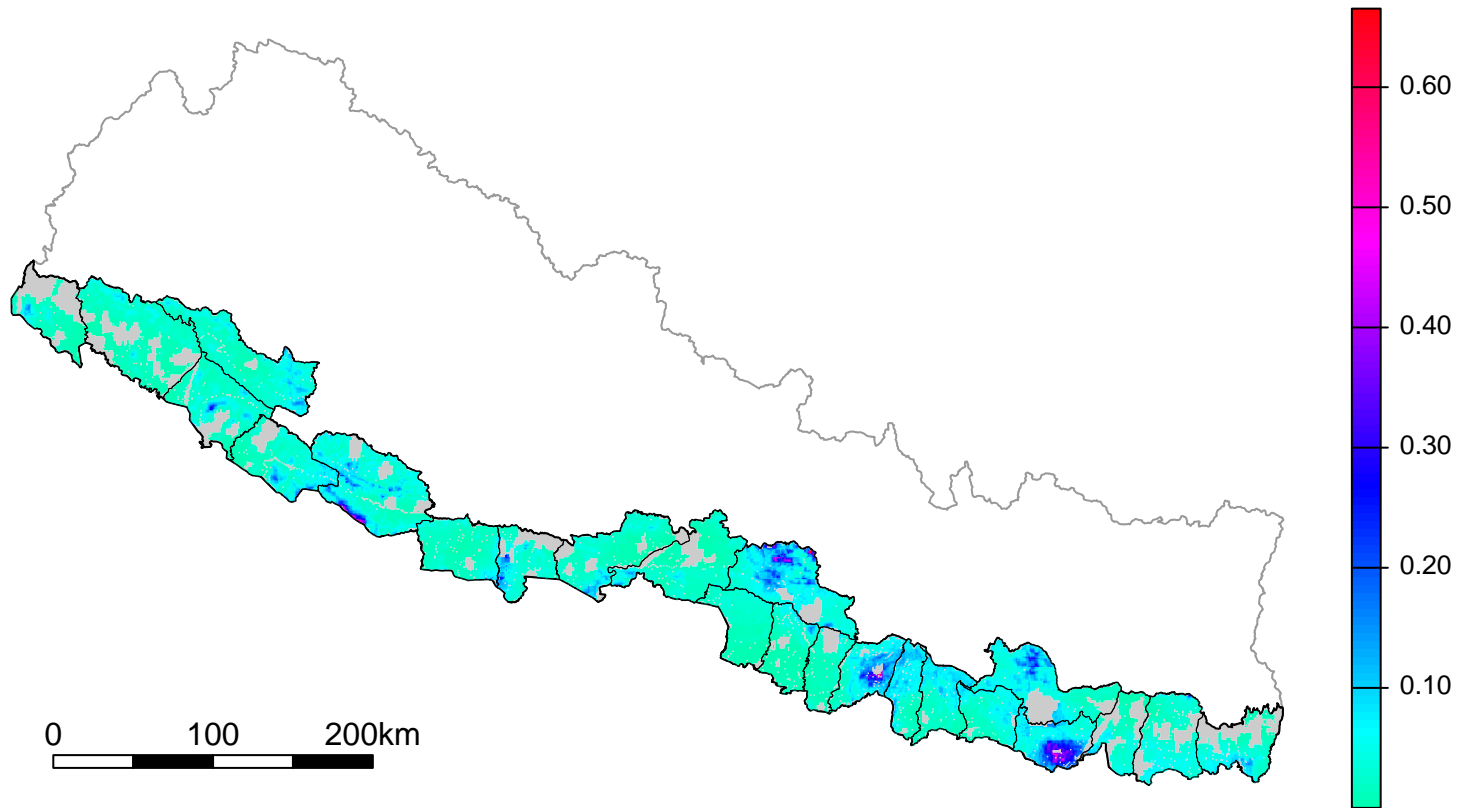

# Average SB risk Vs MAWH\_rc

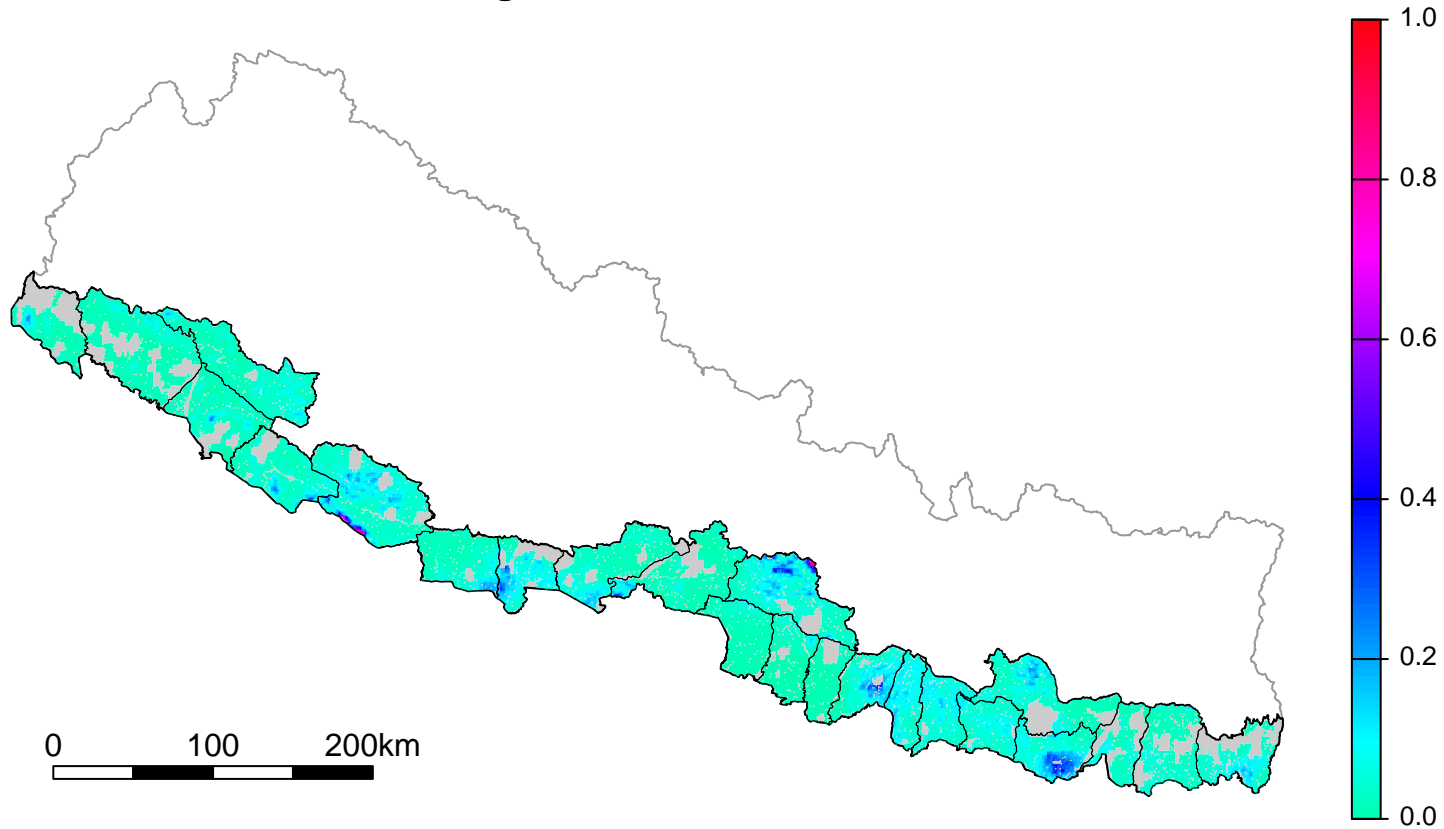

# Average SB risk Vs MAWN\_rc

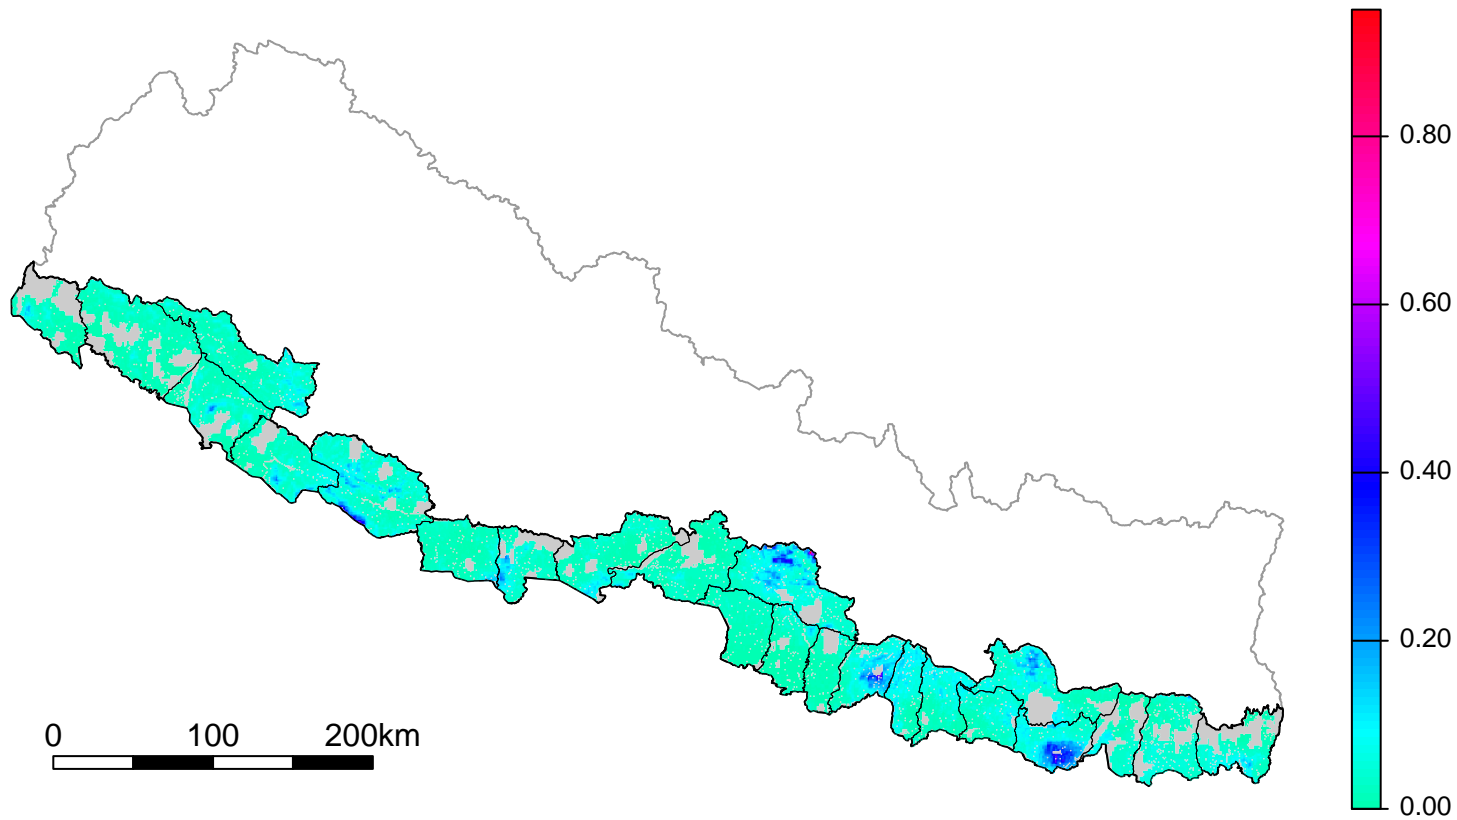

# Average SB risk Vs TADH\_rc

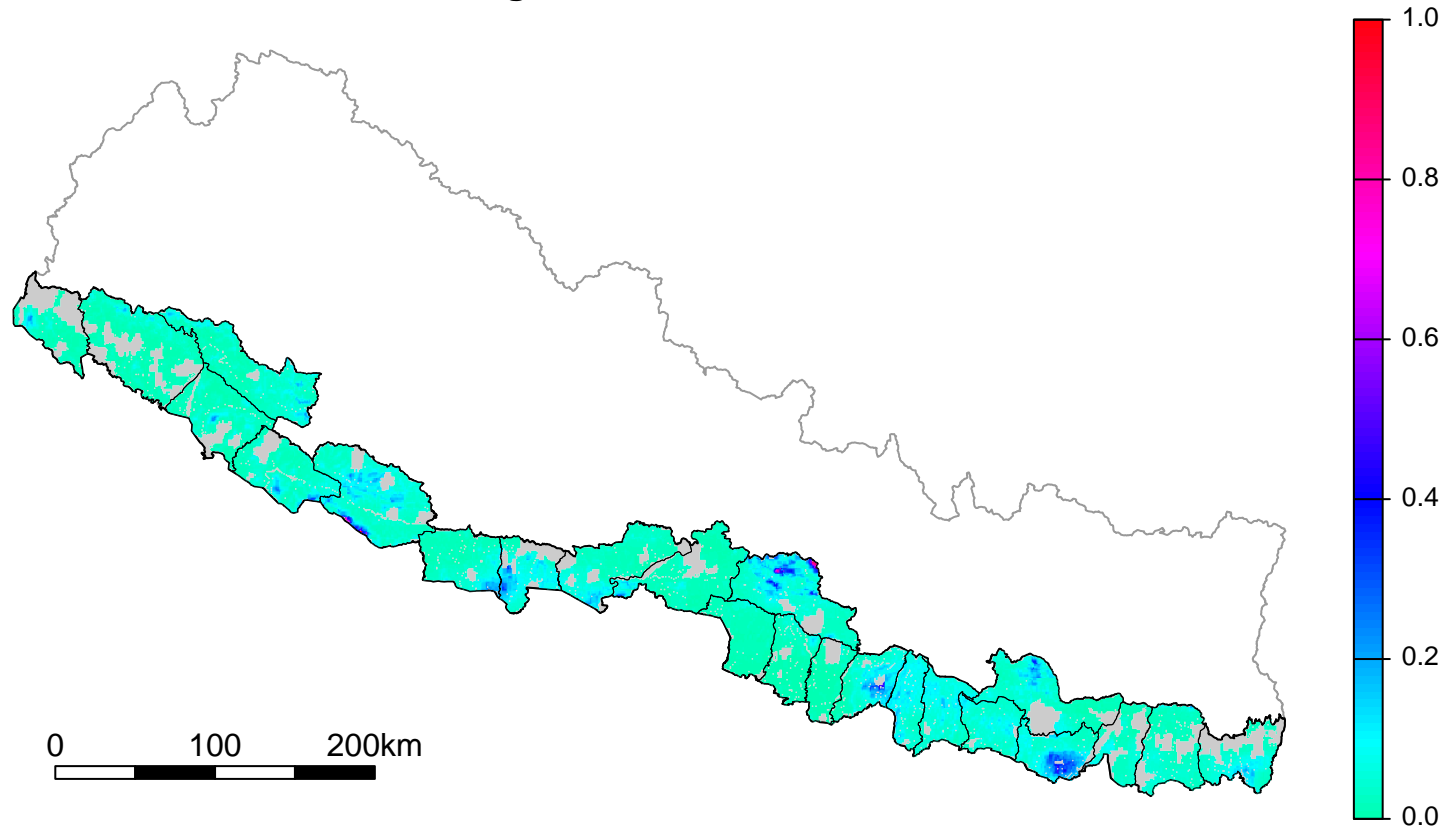

# Average SB risk Vs TADN\_rc

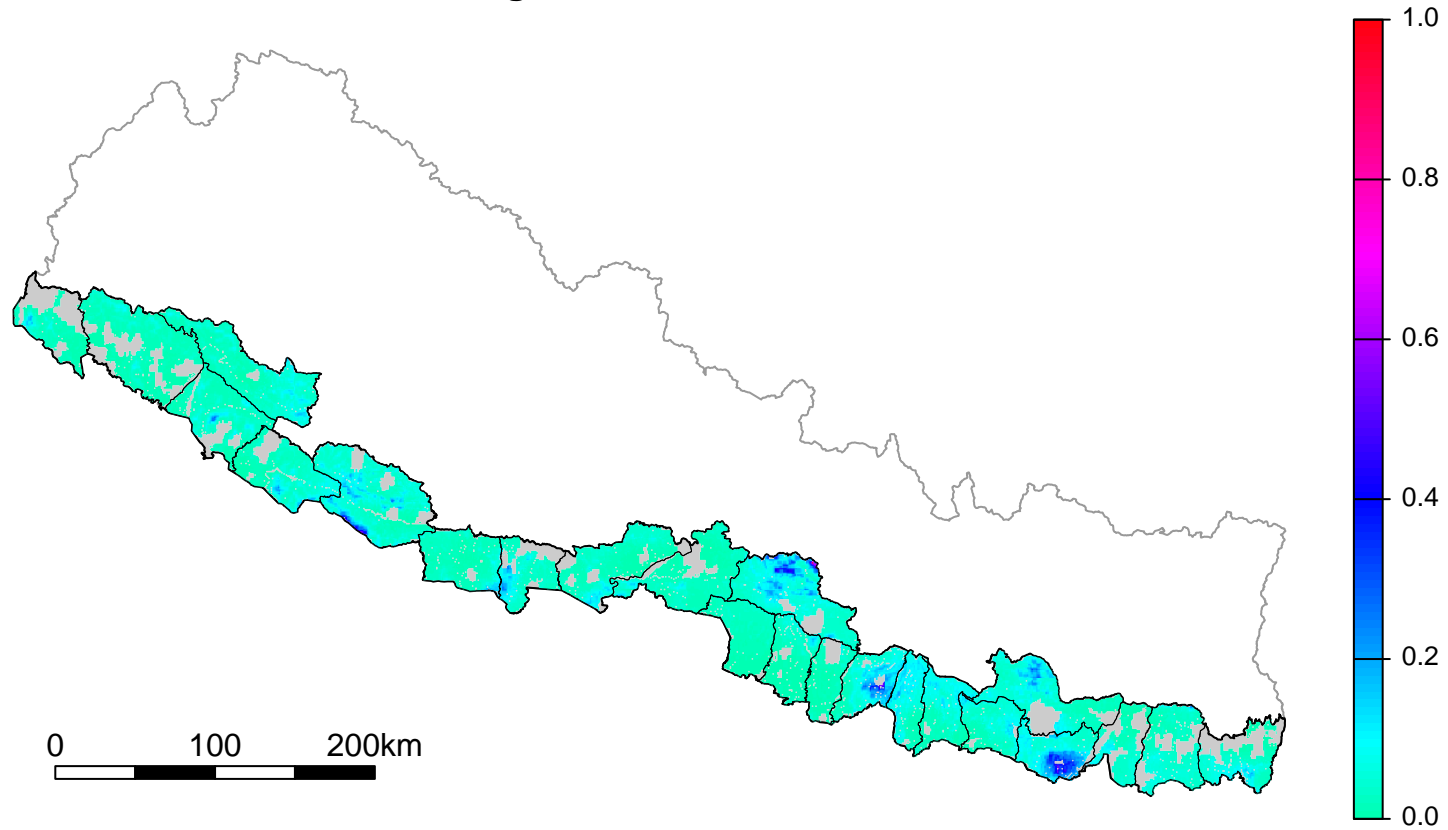

# Average SB risk Vs TAWH\_rc

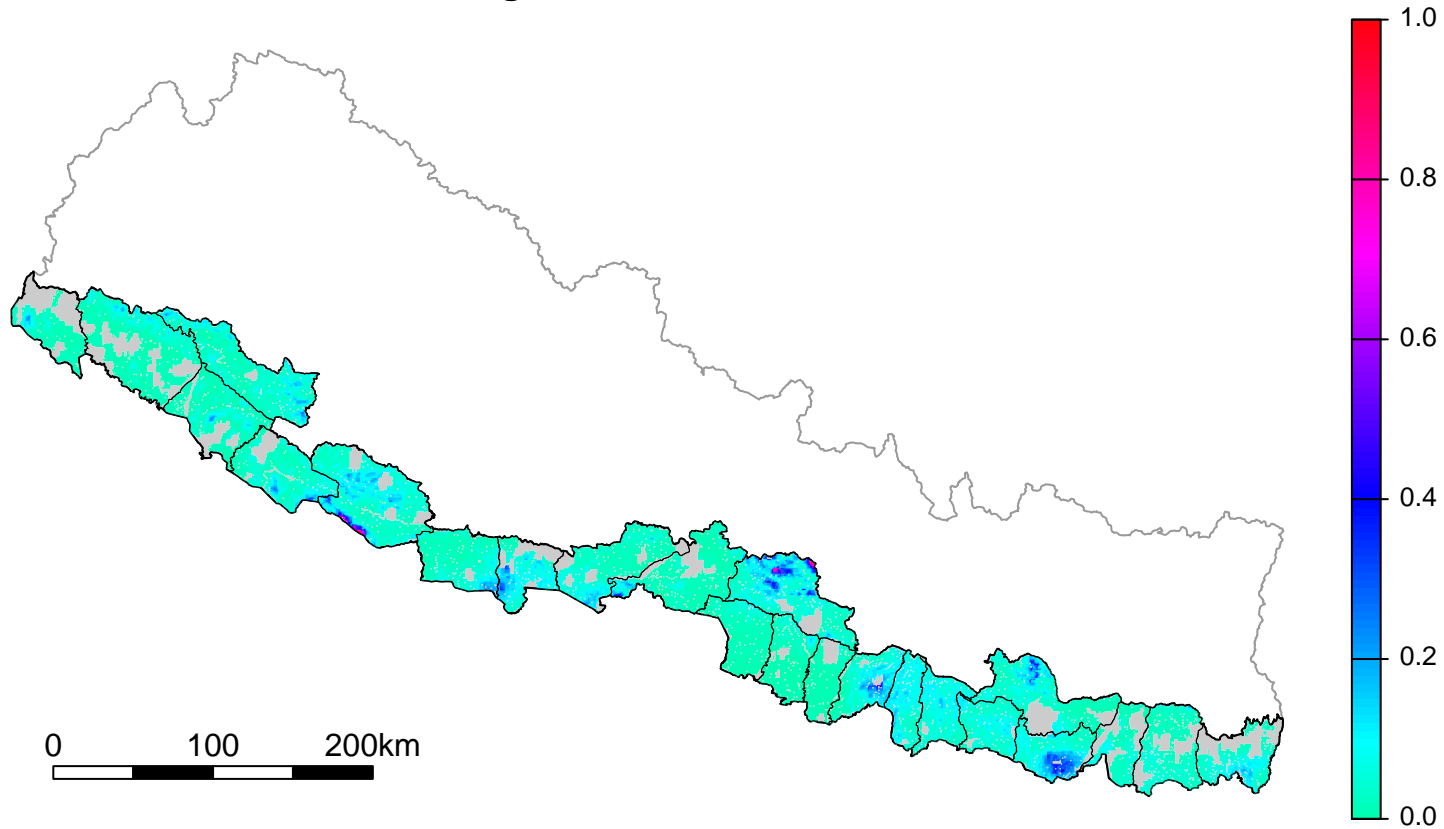

# Average SB risk Vs TAWN\_rc

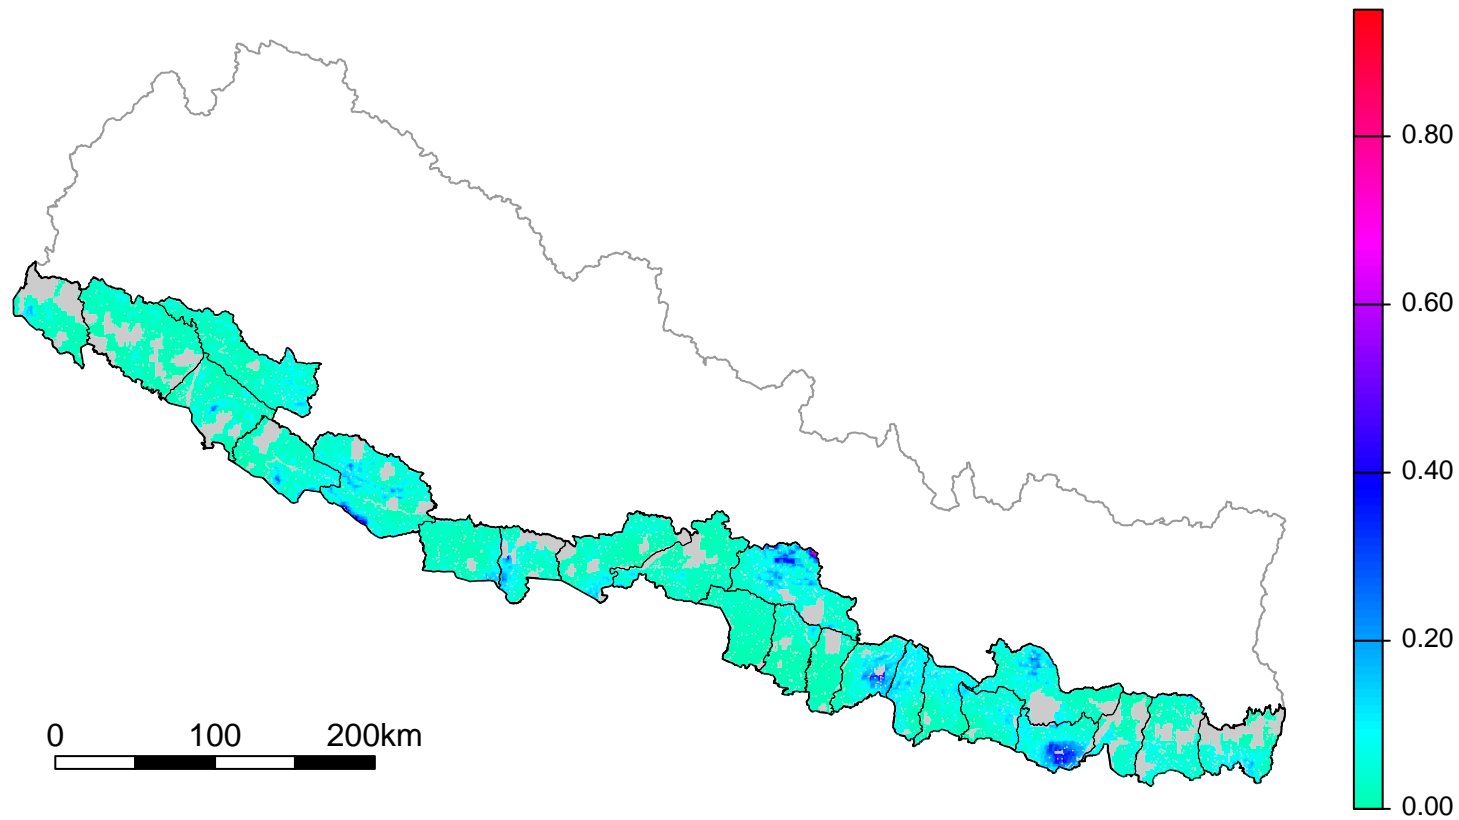



# Low SB risk Vs FUDH\_rc

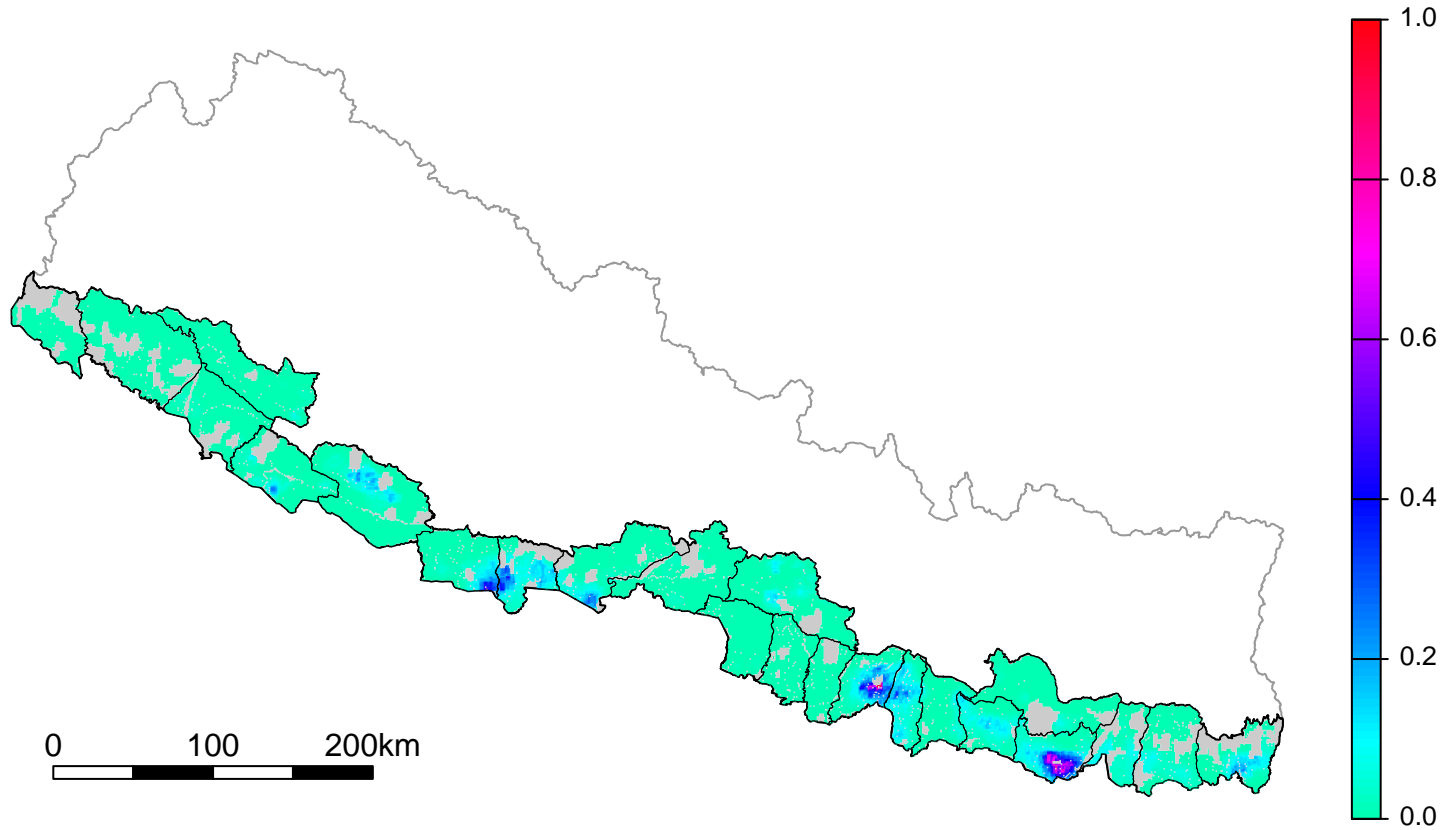

# Low SB risk Vs FUDN\_rc

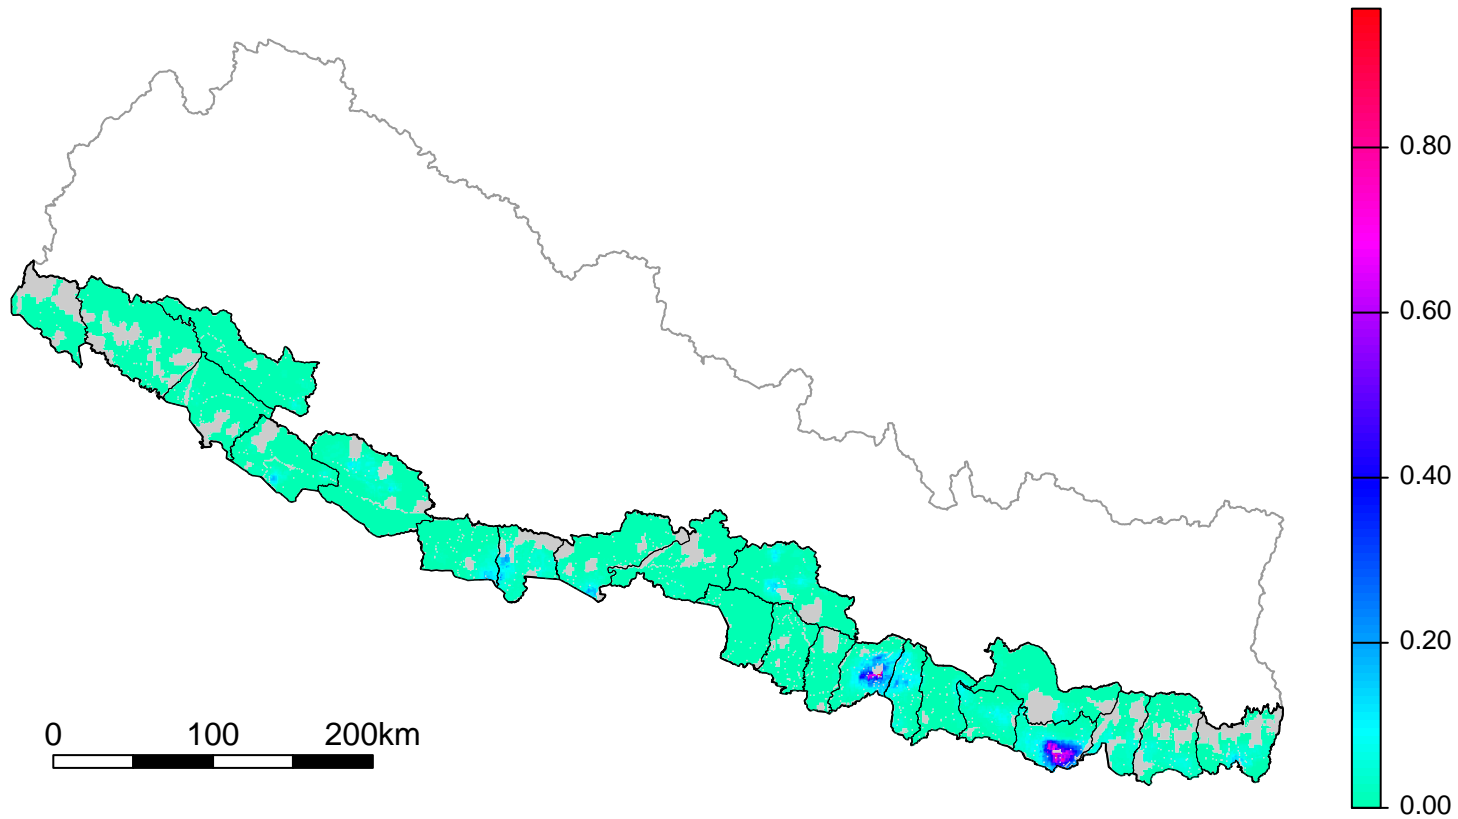

# Low SB risk Vs FUWH\_rc

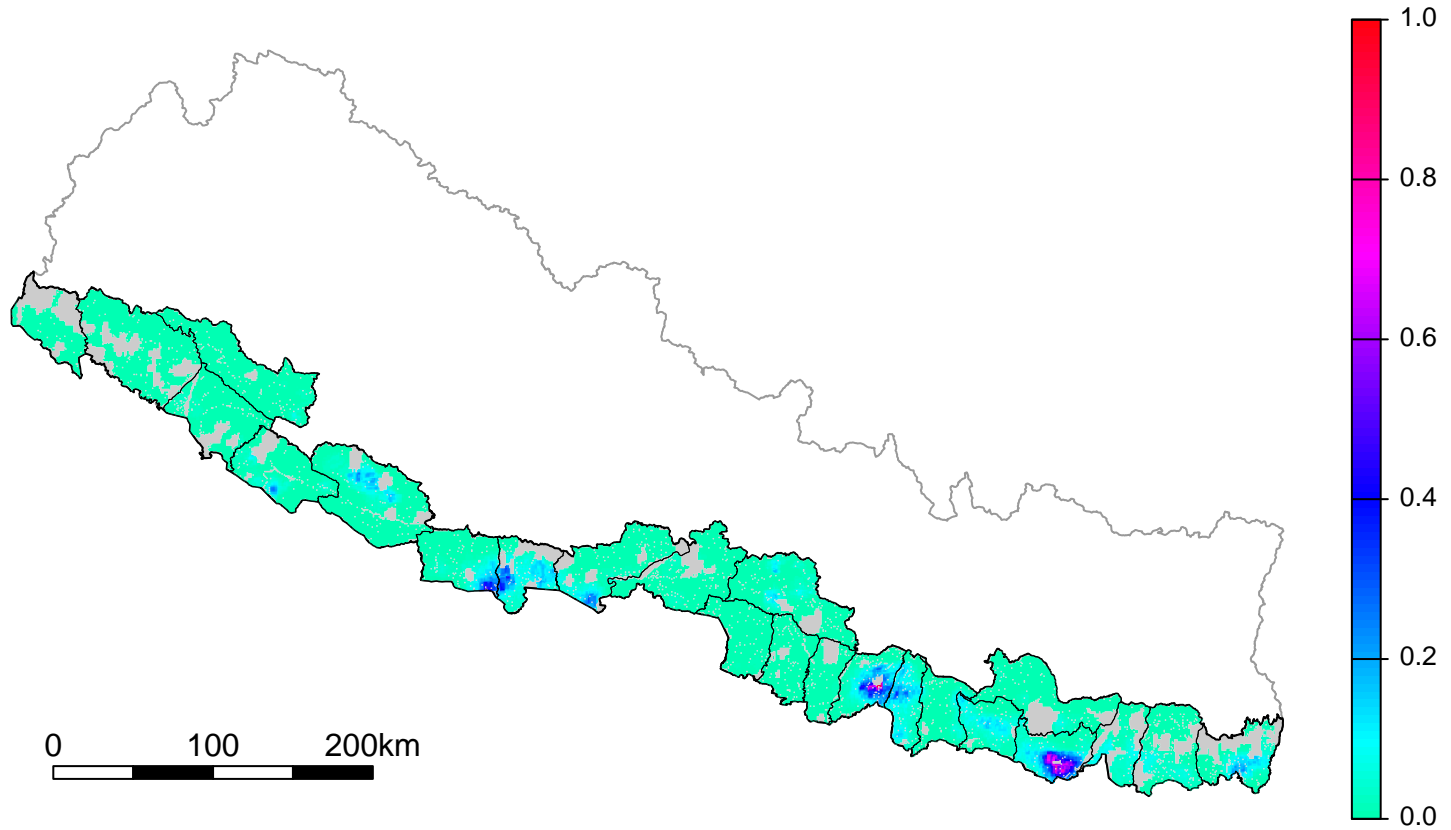

# Low SB risk Vs FUWN\_rc

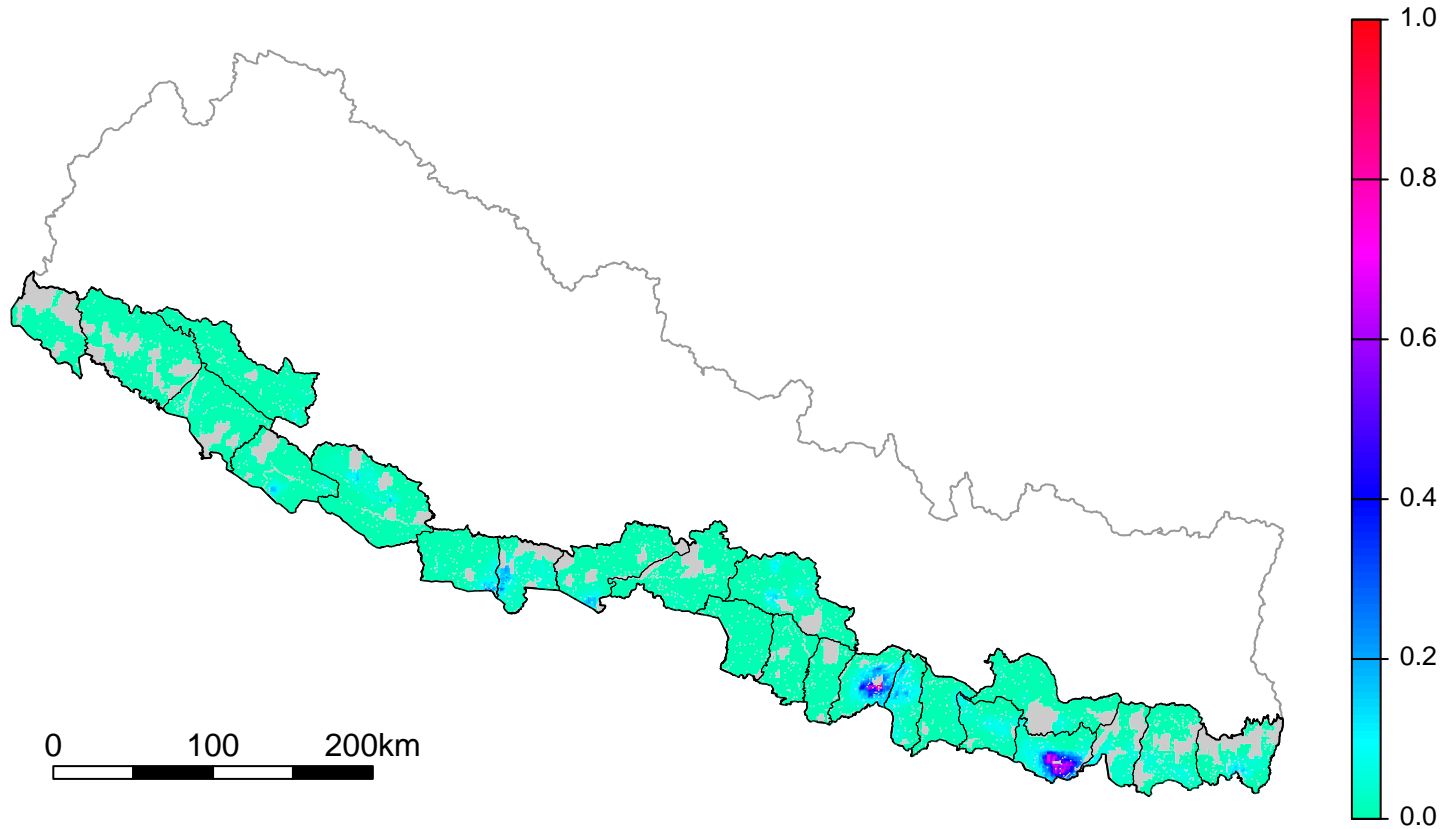

# Low SB risk Vs MUDH\_rc

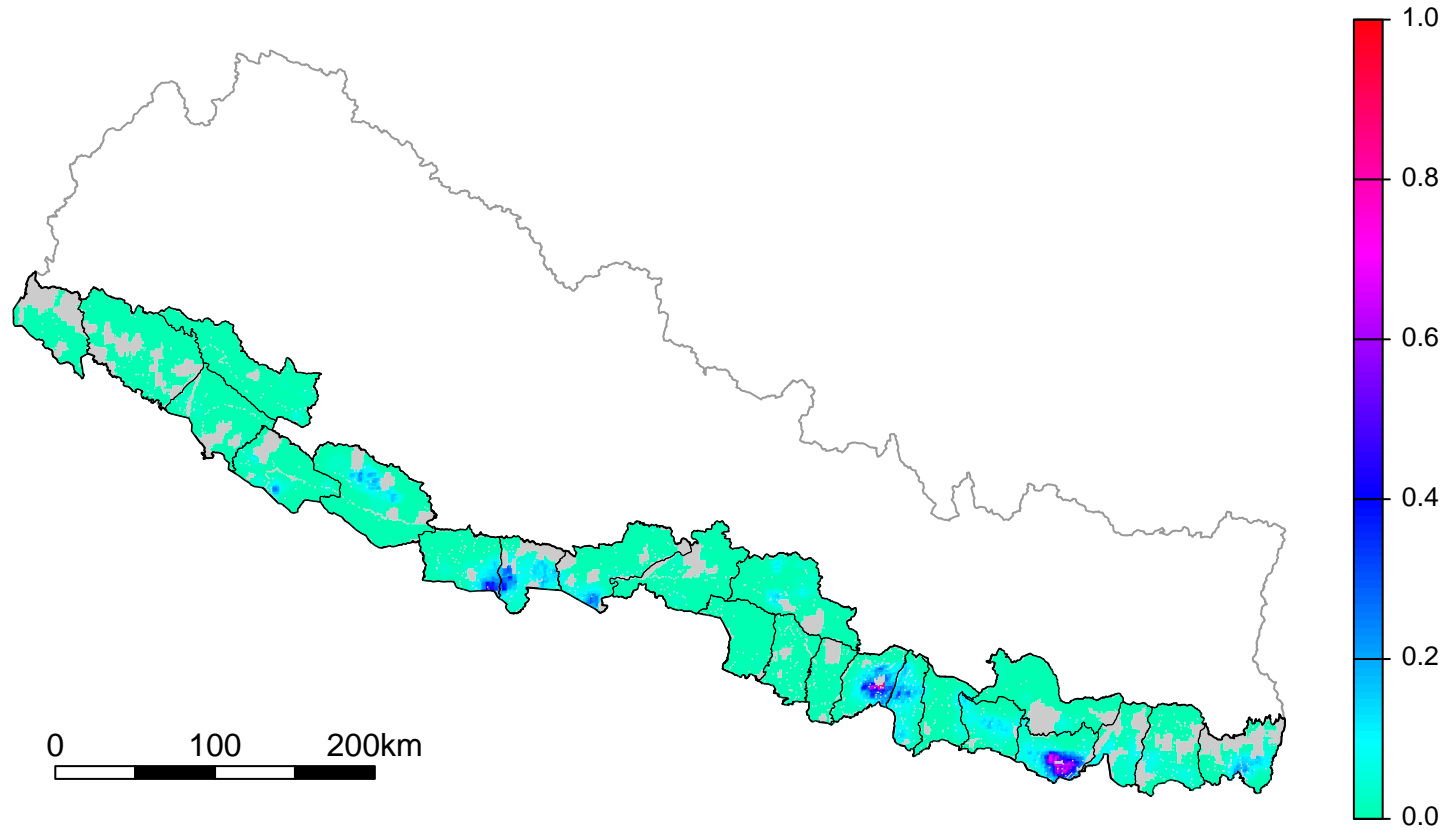

# Low SB risk Vs MUDN\_rc

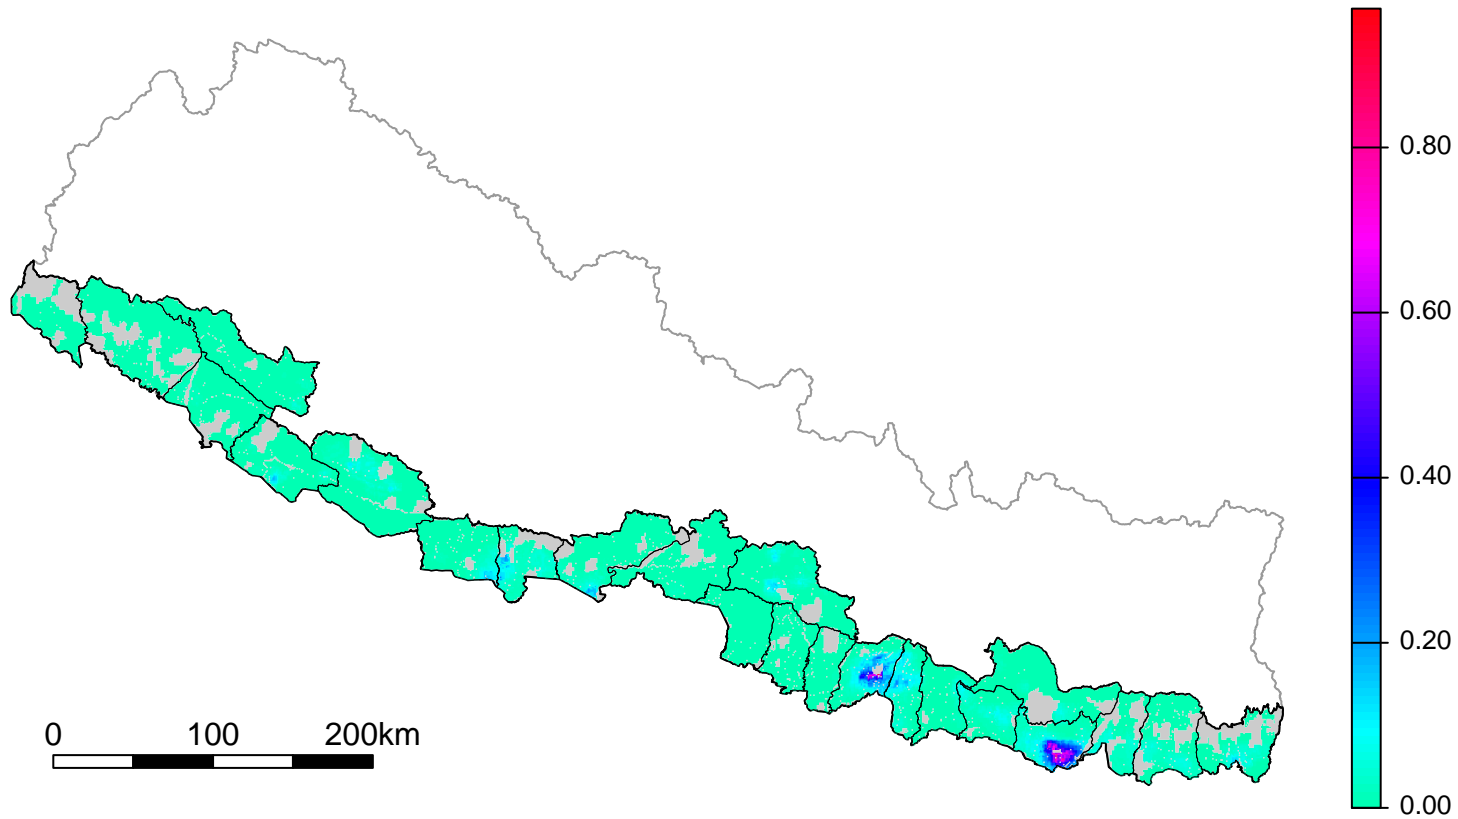

# Low SB risk Vs MUWH\_rc

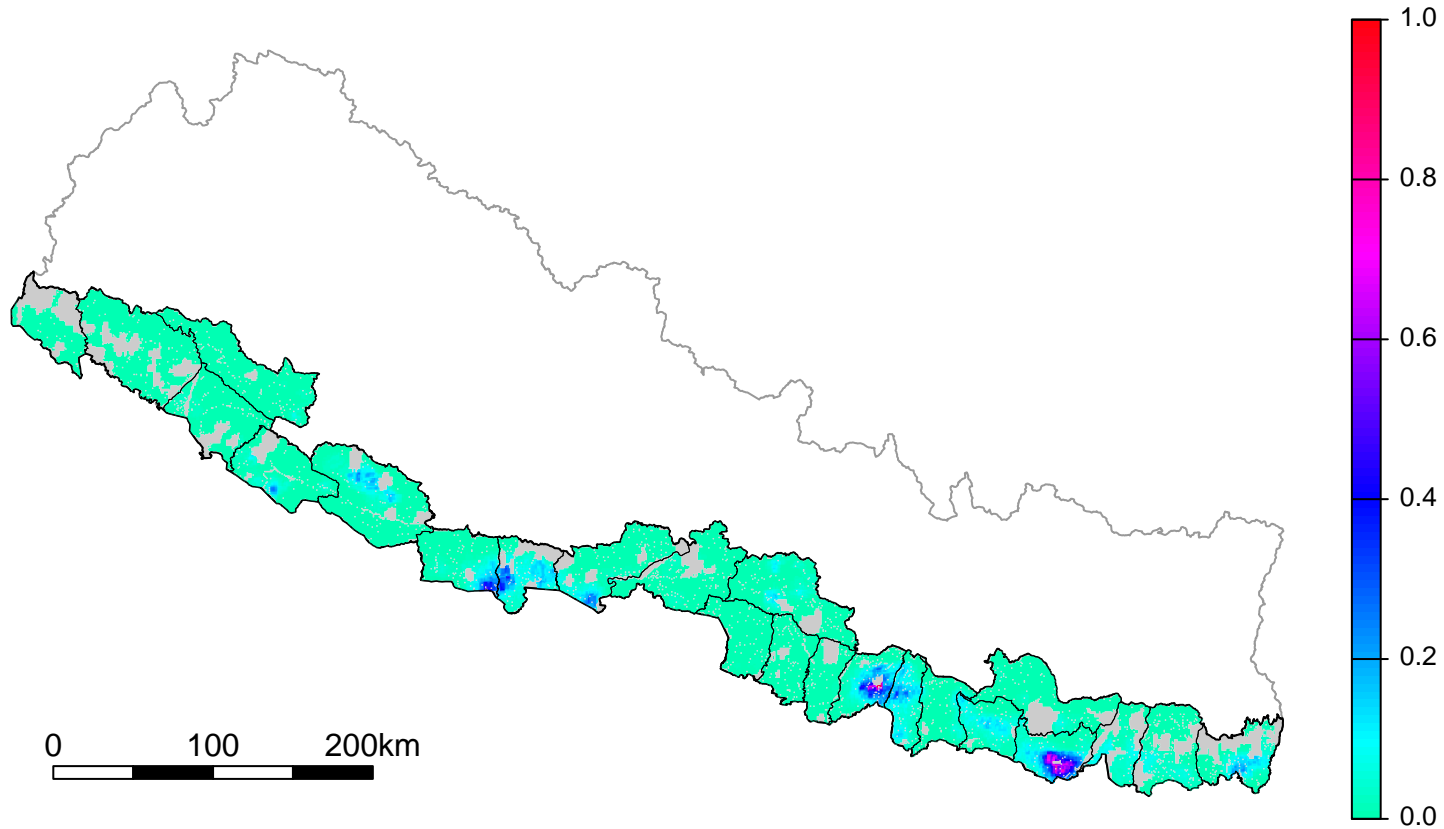

# Low SB risk Vs MUWN\_rc

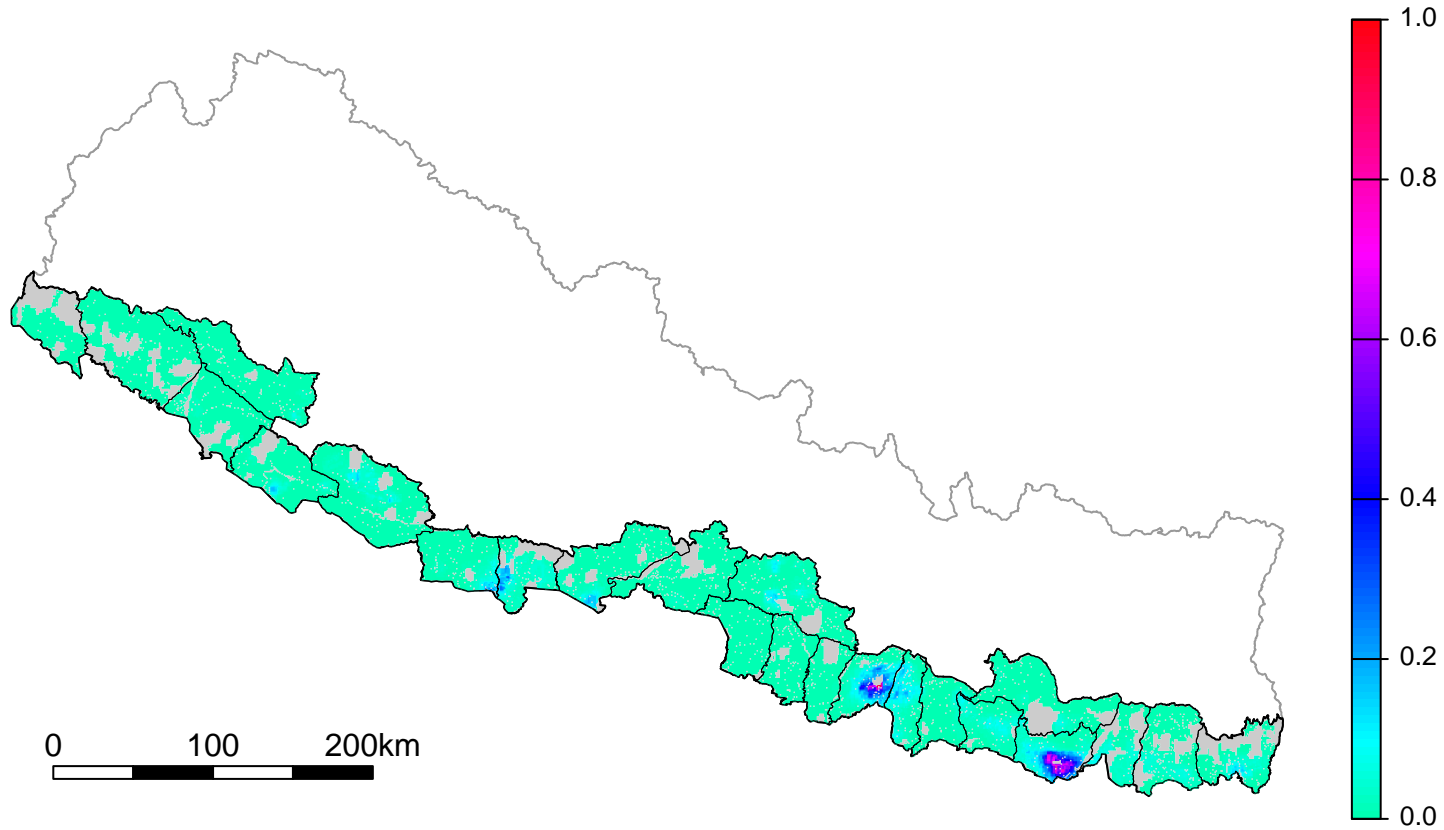



# Low SB risk Vs TUDH\_rc

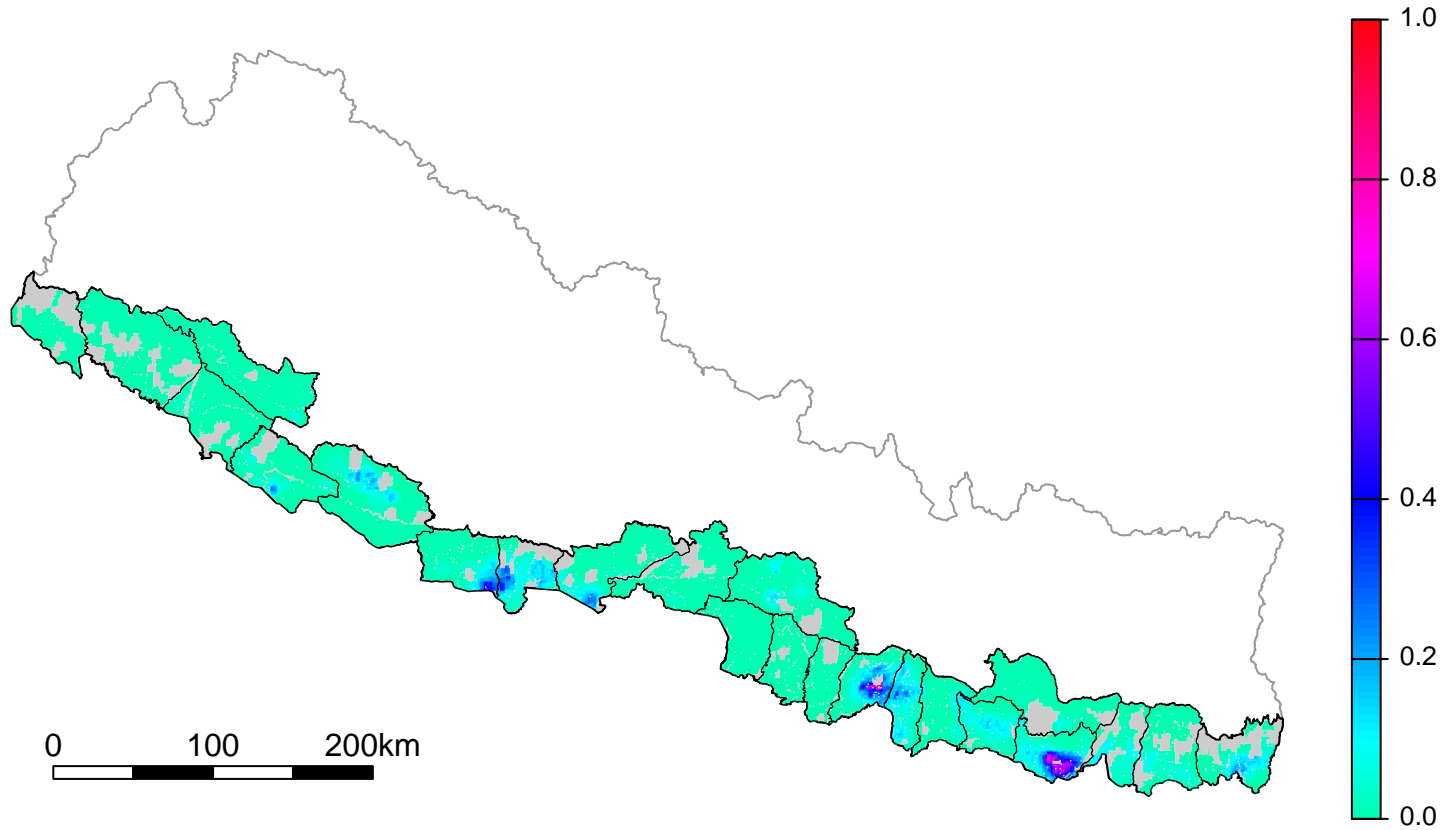

# Low SB risk Vs TUDN\_rc

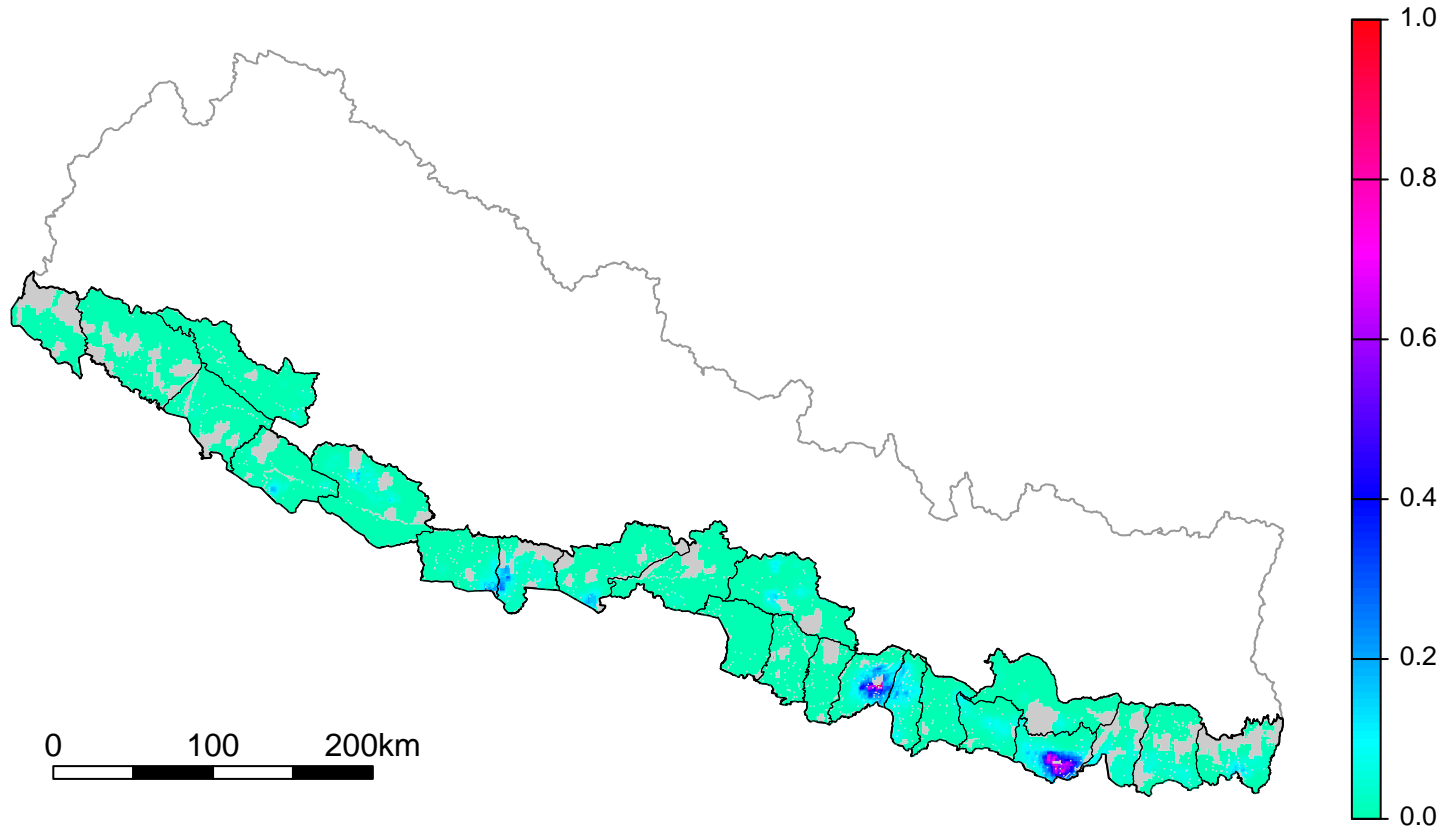

# Low SB risk Vs TUWH\_rc

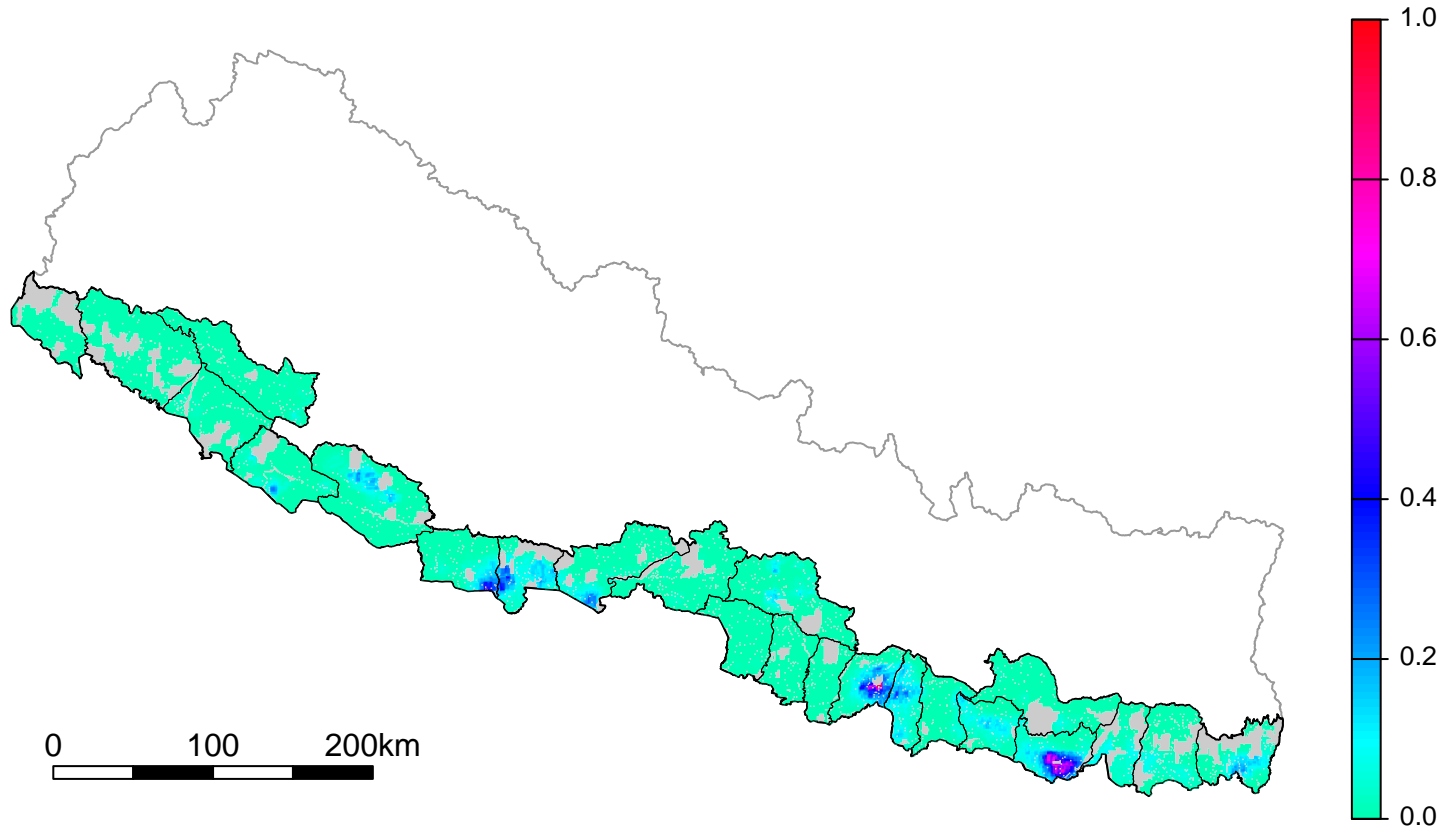

# Low SB risk Vs TUWN\_rc

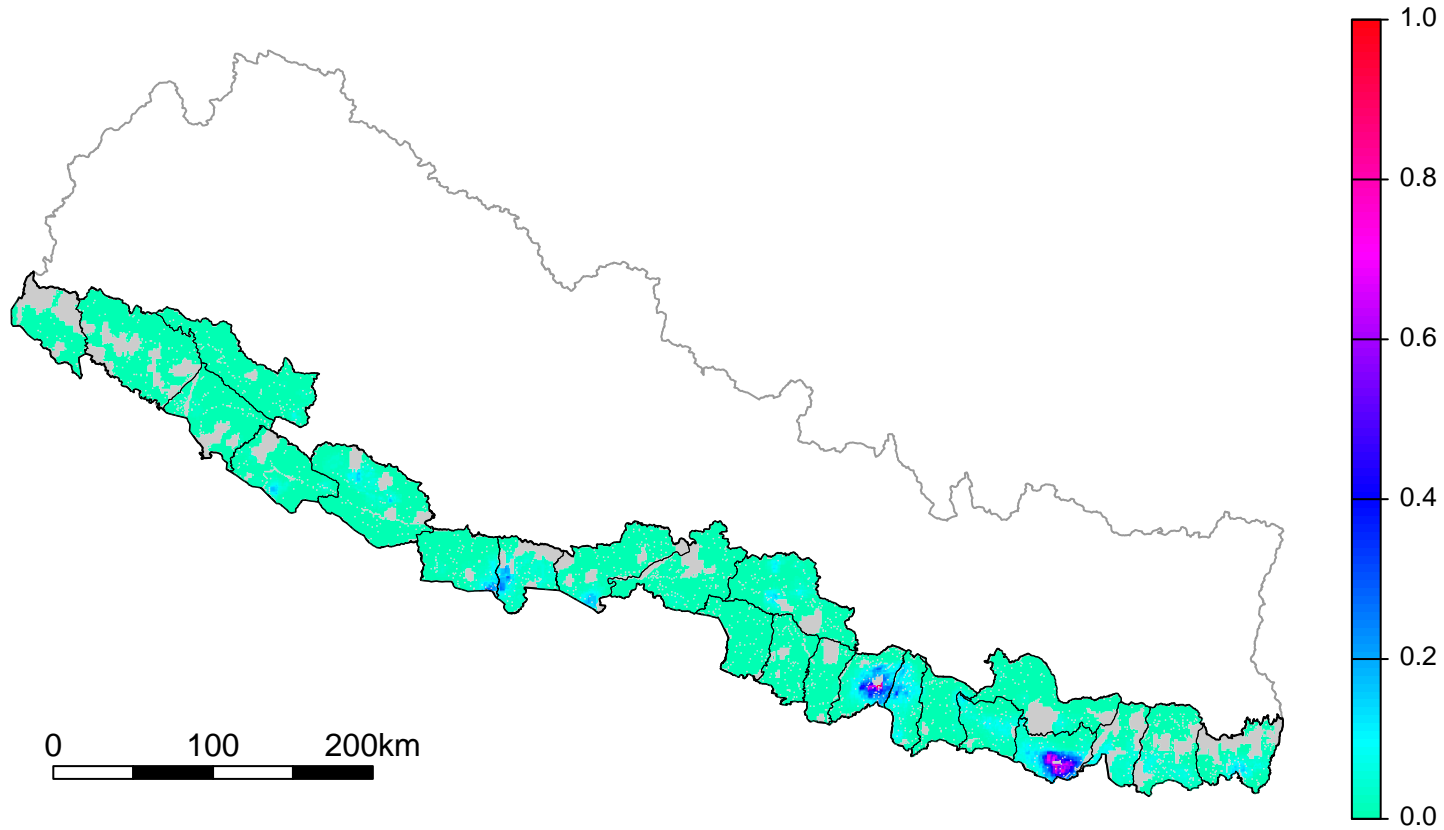

Supplement: mmc3.pdf [file mmc3.pdf]
